# Supplementary material for: Genomic analyses of wild argali, domestic sheep, and their hybrids provide insights into chromosome evolution, phenotypic variation, and germplasm innovation
Source: HighWire-hosted journal article supplement (doi:10.1101/gr.276769.122), 2022-08-10
Supplement: Supplemental_Tables_.xlsx [file Supplemental_Tables_.xlsx]

## Sheet: Table S1
Supplemental Table S1. Sequencing information for Tibetan sheep O. aries, argali O. ammon polii and the F1-hybrid (Ovis ammon polii × Ovis aries).
Pacbio Sequel II-DNA:
Assembly	Library ID	Total pass reads bases / bp	Total pass reads number	Pass reads mean length / bp	Pass reads max length / bp	Pass reads N50 length /bp	>10kb_ratio	>20kb_ratio	>40kb_ratio
Tibetan sheep O. aries	m64064_200913_133105	185067853001	8425807	21964	254162	33727	68.71	46.64	15.29
	m64064_200914_051001	186303800758	8510397	21891	263835	33511	68.74	46.77	14.99
	m64081_200909_010228	186991193385	8213665	22765	263728	34106	70.46	49.89	16.04
	Total	558362847144	25149869	22201	263835	33787	69.29	47.75	15.43
Argali O. ammon polii	m64066_210524_131654	247471153421	8945317	27664	461235	38353	78.35	61.1	23.48
	m64067_210526_104458	184993206444	7291149	25372	493253	35695	74.93	56.61	18.93
	Total	432464359865	16236466	26635	493253	37194	76.81	59.08	21.44
The F1-hybrid (Ovis ammon polii × Ovis aries)	m64180_210628_075906	12655602916	631966	20025	55068	20265	99.88	42.8	0.1
	m64180_210716_114933	30460099423	1549560	19657	60526	20173	99.95	40.41	0.27
	m64180_210717_180127	28989250346	1459994	19855	60423	20399	99.96	42.41	0.23
	m64181_210715_053609	33516966321	1733198	19338	58752	19826	99.95	38.06	0.24
	m64181_210717_200004	25148328932	1291945	19465	59472	20016	99.94	39.27	0.25
	Total	130770247938	6666663	19615	60526	20119	99.94	40.24	0.23
Illumina Novaseq/MGI-2000-DNA:
Assembly	Total reads	Total bases	Clean reads	Clean bases	Q20 rate(%)	Q30 rate(%)	GC(%)
Tibetan sheep O. aries	2818415618	422762342700	2788751246	403084868674	97.4929	93.2971	43.728
Argali O. ammon polii	1154949738	173242460700	1135572792	158080881637	96.95	91.61	44.2
The F1-hybrid (Ovis ammon polii × Ovis aries)	1023115260	153467289000	1012690340	140853873326	97.73	93.52	43.58
Pacbio Sequel II-RNA:
Assembly	Reads of insert	Reads bases of insert (bp)	Mean reads length of insert (bp)	Mean number of passes	Mean read quality value
Tibetan sheep O. aries	486893	1230918409	2528	25.03	0.991604
Argali O. ammon polii	764875	2569937858	3359	25.53	0.99276
The F1-hybrid (Ovis ammon polii × Ovis aries)	816423	2324483152	2847	25.46	0.99152
Illumina Novaseq/MGI-2000-RNA:
Assembly	Sample	Total Reads	Total Bases	Clean Reads	Clean Bases	Q20 Rate(%)	Q30 Rate(%)	GC(%)
Tibetan sheep O. aries	skeletal muscle	63269020	9490353000	61441352	9185083457	97.83	93.65	52.38
	heart	58523772	8778565800	57610276	8619854631	98.12	94.23	50.79
	liver	56168864	8425329600	54585100	8167959495	97.81	93.63	49.83
	spleen	68971348	10345702200	66940060	9996332528	98.03	94.15	51.59
	lung	80067980	12010197000	78556284	11742508589	98.11	94.32	51.22
	esophagus	103251168	15487675200	100601488	15034839901	98.1	94.37	53.85
	uterus	78366376	11754956400	76196476	11388847860	97.99	93.99	50.72
	trachea	76542770	11481415500	74846260	11194448813	98.15	94.49	52.93
	small intestine	71594690	10739203500	69504376	10377361488	97.77	93.56	51.96
	skin	100059506	15008925900	97215636	14530370162	98.03	94.23	52.75
Argali O. ammon polii	fibroblasts	62919096	9437864400	62012458	9276001770	97.38	92.65	51.7
The F1-hybrid (Ovis ammon polii × Ovis aries)	fibroblasts	62439292	9365893800	61458292	9177649343	97.57	93.34	51.15
Bionano:
Assembly	Raw Data Quantity(Gb)	Clean Data Quantity(Gb)	Clean Data Average Lable (/100Kb)	Clean Data N50(Kb)
Tibetan sheep O. aries	730.37	432.9	13.68	370.1
Argali O. ammon polii	630.345	592.99	13.03	230.6
Hi-C:
Assembly	Raw Paired-end Reads	Clean Paired-end Reads	Clean Bases(bp)	Clean Paired-end Reads Rate (%)	Clean Q30 Bases Rate (%)
Tibetan sheep O. aries	1641859042	1618041082	161759247812	98.55	91.96
Argali O. ammon polii	2126650692	2106908492	315284233817	99.07	93.69
The F1-hybrid (Ovis ammon polii × Ovis aries)	2632898318	2607401094	390110331759	99.03	92.82

## Sheet: Table S2
Supplemental Table S2. Statistics of the chromosomal level assemblies of Tibetan sheep O. aries, argali O. ammon polii and the F1-hybrid (Ovis ammon polii × Ovis aries).
Assembly	Pseudo-chromosome	Chromosome	Length	Scaffold number
Tibetan sheep O. aries	LG01	Chr1	280644136	3
	LG02	Chr2	252362713	2
	LG03	Chr3	226826216	2
	LG05	Chr4	121514229	1
	LG07	Chr5	108580084	1
	LG06	Chr6	118786809	1
	LG08	Chr7	105184753	15
	LG11	Chr8	91237811	1
	LG09	Chr9	95403819	1
	LG10	Chr10	91562362	4
	LG18	Chr11	67716071	27
	LG14	Chr12	81071312	4
	LG12	Chr13	83580535	1
	LG19	Chr14	67387920	1
	LG13	Chr15	83093940	1
	LG16	Chr16	72105115	1
	LG15	Chr17	73523957	1
	LG17	Chr18	70760168	2
	LG21	Chr19	60600000	1
	LG22	Chr20	52181980	1
	LG24	Chr21	51086750	1
	LG23	Chr22	51925645	1
	LG20	Chr23	62764803	1
	LG27	Chr24	45006986	3
	LG25	Chr25	45418129	1
	LG26	Chr26	45297346	1
	LG04	ChrX	144257616	3
	Contig1-31	Contig1-31	3962150	31
	Total	-	2653843355	113
Argali O. ammon polii	LG01	LG01	280777395	3
	LG02	LG02	226800367	2
	LG04	LG04	137560935	1
	LG05	LG05	121904323	2
	LG06	LG06	119675594	1
	LG08	LG08	108757324	1
	LG07	LG07	113376182	1
	LG11	LG11	92548278	1
	LG09	LG09	102356453	1
	LG12	LG12	87748868	1
	LG13	LG13	83724545	1
	LG10	LG10	95380028	2
	LG14	LG14	83118421	1
	LG15	LG15	80466520	3
	LG16	LG16	73273851	1
	LG19	LG19	66803135	3
	LG20	LG20	62572589	1
	LG17	LG17	71989486	1
	LG18	LG18	71439771	3
	LG22	LG22	60606496	1
	LG24	LG24	52257586	2
	LG21	LG21	62566906	1
	LG23	LG23	53706581	52
	LG25	LG25	51745270	2
	LG27	LG27	45133197	1
	LG28	LG28	45104313	1
	LG26	LG26	51293086	3
	LG03	ChrX	136603326	2
	LG29	ChrY	19437014	8
	Contig1-33	Contig1-33	5552178	33
	Total	-	2664280018	136
The F1-hybrid (Ovis ammon polii × Ovis aries; n = 27)	D-LG01	D-LG01	284817455	4
	D-LG02	D-LG02	257928859	4
	D-LG03	D-LG03	229974199	3
	D-LG04	D-LG04	127533817	3
	D-LG05	D-LG05	125106506	3
	D-LG06	D-LG06	110647993	1
	D-LG07	D-LG07	105238251	3
	D-LG08	D-LG08	92694311	2
	D-LG09	D-LG09	101515200	5
	D-LG10	D-LG10	98159008	4
	D-LG11	D-LG11	92711155	2
	D-LG12	D-LG12	90872699	4
	D-LG13	D-LG13	87398740	3
	D-LG14	D-LG14	82726870	3
	D-LG15	D-LG15	77913213	1
	D-LG16	D-LG16	70516763	3
	D-LG17	D-LG17	74052031	1
	D-LG18	D-LG18	66178623	2
	D-LG19	D-LG19	63044409	1
	D-LG20	D-LG20	61538859	2
	D-LG21	D-LG21	58700459	1
	D-LG22	D-LG22	59726047	3
	D-LG23	D-LG23	56141761	3
	D-LG24	D-LG24	54707074	2
	D-LG25	D-LG25	51443936	2
	D-LG26	D-LG26	51413323	4
	D-LG27	ChrX	145922826	3
	Contig1-138	Contig1-138	120372910	138
	Total	-	2898997297	210
The F1-hybrid (Ovis ammon polii × Ovis aries; n = 28)	A-LG01	A-LG01	282586547	2
	A-LG02	A-LG02	228820480	4
	A-LG03	A-LG03	140055537	1
	A-LG04	A-LG04	120329989	4
	A-LG05	A-LG05	125365812	5
	A-LG06	A-LG06	123095534	2
	A-LG07	A-LG07	109767231	2
	A-LG08	A-LG08	109348142	3
	A-LG09	A-LG09	104793738	4
	A-LG10	A-LG10	102897027	5
	A-LG11	A-LG11	92787451	3
	A-LG12	A-LG12	91336929	3
	A-LG13	A-LG13	85516188	4
	A-LG14	A-LG14	90077289	3
	A-LG15	A-LG15	79176663	2
	A-LG16	A-LG16	72915068	2
	A-LG17	A-LG17	75682104	3
	A-LG18	A-LG18	73864376	1
	A-LG19	A-LG19	68701269	5
	A-LG20	A-LG20	63472910	3
	A-LG21	A-LG21	61643156	2
	A-LG22	A-LG22	60432259	5
	A-LG23	A-LG23	52021798	2
	A-LG24	A-LG24	50512462	2
	A-LG25	A-LG25	54108581	3
	A-LG26	A-LG26	49120270	3
	A-LG27	A-LG27	48464535	3
	A-LG28	ChrY	30158614	10
	Contig1-86	Contig1-86	63856046	86
	Total	-	2710908005	177

## Sheet: Table S3
Supplemental Table S3. Quality evaluation of the draft assemblies of Tibetan sheep, argali and the F1-hybrid.
Assembly	Complete BUSCOs (%)	BLAST hit in NT database (%)	Coverage 10× from Illumina reads (%)	Homozygous SNP	Homozygous Indel	Error rate by homozygous variants(%)
Tibetan sheep O. aries	911(95.49%)	Metazoa (99.98%); Nohit (0.02%)	0.999	5264	7274	0.000473
Argali O. ammon polii	8,851(95.94%)	Metazoa (99.96%); Nohit (0.04%)	0.9984	6380	10294	0.000627
The F1-hybrid (Ovis ammon polii × Ovis aries)	8,909(96.56%)	Metazoa (99.73%); Nohit (0.27%)	0.9904	434	2262	5.1e-07

## Sheet: Table S4
Supplemental Table S4. Statistics of repeats in the assemblies of Tibetan sheep, argali and the F1-hybrid.
Category	Class	Order	Tibetan sheep O. aries				Argali O. ammon polii				The F1-hybrid (Ovis ammon polii × Ovis aries; n=27)				The F1-hybrid (Ovis ammon polii × Ovis aries; n=28)
			Super family	Number of elements	Length of sequence (bp)	Percentage of sequence	Super family	Number of elements	Length of sequence (bp)	Percentage of sequence	Super family	Number of elements	Length of sequence (bp)	Percentage of sequence	Super family	Number of elements	Length of sequence (bp)	Percentage of sequence
Transposable Elements	Class I	LINE	L1	916335	347597621	0.131	L1	889620	340111071	0.1277	L1	918698	353187962	0.1189	L1	861440	326085727	0.1232
			L2	169662	29154408	0.011	L2	146525	25847997	0.0097	L2	168693	28931671	0.0097	L2	155684	26900488	0.0102
			RTE-BovB	647334	341118678	0.1285	RTE-BovB	792255	398181195	0.1495	RTE-BovB	726842	380530185	0.1281	RTE-BovB	691127	359101675	0.1357
			CR1	19310	3078939	0.0012	RTE-X	12159	2919032	0.0011	Unknown	9356	5268441	0.0018	Unknown	6701	4998868	0.0019
			Other	51216	4587300	0.0017	CR1	18307	3344639	0.0013	CR1	19354	3080456	0.001	CR1	18115	2856645	0.0011
			Total	1803857	725536946	0.2734	Other	43476	7327909	0.0028	Other	44060	2857048	0.001	Other	41203	2667696	0.001
							Total	1902342	777731843	0.2921	Total	1887003	773855763	0.2605	Total	1774270	722611099	0.273
		LTR	ERV1	238856	49534566	0.0187	ERV1	217441	45859806	0.0172	ERV1	247473	51756971	0.0174	ERV1	231771	47730792	0.018
			Gypsy	47297	3414190	0.0013	Gypsy	42203	2989129	0.0011	Gypsy	47007	3245410	0.0011	Gypsy	45601	3082130	0.0012
			ERVK	29231	9982204	0.0038	ERVK	27741	9560518	0.0036	ERVK	36879	13086610	0.0044	ERVK	28983	10002060	0.0038
			Unknown	22728	3933129	0.0015	Unknown	24255	5343801	0.002	Unknown	27470	5461776	0.0018	Unknown	23696	6174408	0.0023
			ERVL	108194	28253316	0.0106	ERVL	97554	25419426	0.0095	ERVL	108529	28317427	0.0095	ERVL	102254	26523487	0.01
			ERVL-MaLR	157895	37076524	0.014	ERVL-MaLR	141229	33065946	0.0124	ERVL-MaLR	158261	37175253	0.0125	ERVL-MaLR	152005	35692749	0.0135
			Other	15759	644097	0.0002	Other	14481	604753	0.0002	Other	16266	801653	0.0003	Other	15275	619923	0.0002
			Total	619960	132838026	0.0501	Total	564904	122843379	0.046	Total	641885	139845100	0.0471	Total	599585	129825549	0.049
		SINE	MIR	260907	30666335	0.0116	Unknown	324853	30271433	0.0114	MIR	262175	30854263	0.0104	Unknown	31256	2674097	0.001
							MIR	231549	27150468	0.0102					MIR	246815	28987164	0.011
			Core-RTE	241683	41057455	0.0155	Core-RTE	215836	36588494	0.0137	Core-RTE	243486	41448574	0.014	Core-RTE	232599	39495109	0.0149
			tRNA-Core-RTE	753293	127291036	0.048	tRNA-Core-RTE	673333	113418616	0.0426	tRNA-Core-RTE	785269	127854561	0.043	tRNA-Core-RTE	723008	122157237	0.0461
			Other	25021	1643040	0.0006	Other	9499	430508	0.0002	Other	41111	1939464	0.0007	Other	10129	474289	0.0002
			Total	1280904	200657866	0.0756	Total	1455070	207859519	0.078	Total	1332041	202096862	0.068	Total	1243807	193787896	0.0732
		Total	-	3704721	1059032838	0.3991	-	3922316	1108434741	0.416	-	3860929	1115797725	0.3756	-	3617662	1046224544	0.3952
	Class II	MITE	Unknown	148729	43242766	0.0163	Unknown	58720	5729823	0.0022	Other	13138	1691396	0.0006	Unknown	12602	3292366	0.0012
			Total	148729	43242766	0.0163	Total	58720	5729823	0.0022	Total	13138	1691396	0.0006	Total	12602	3292366	0.0012
		DNA	Unknown	57121	4111373	0.0015	Unknown	46419	3597048	0.0014	TcMar-Tigger	62479	13493469	0.0045	Unknown	30590	3003675	0.0011
			TcMar-Tigger	62799	13411434	0.0051	TcMar-Tigger	55476	12091669	0.0045					TcMar-Tigger	60002	12804418	0.0048
			hAT-Charlie	176512	28535745	0.0108	hAT-Charlie	157969	25832257	0.0097	hAT-Charlie	179995	28556920	0.0096	hAT-Charlie	167982	26994036	0.0102
			hAT-Tip100	46303	7040769	0.0027	hAT-Tip100	41364	6264741	0.0024	hAT-Tip100	46486	7045902	0.0024	hAT-Tip100	44231	6680694	0.0025
			TcMar-Mariner	14731	3034762	0.0011	TcMar-Mariner	8184	2695582	0.001	Other	311967	20077239	0.0068	TcMar-Mariner	9082	2918579	0.0011
			Other	257814	14572753	0.0055	Other	235275	13755967	0.0052					Other	249851	13893981	0.0052
			Total	615280	70706836	0.0266	Total	544687	64237264	0.0242	Total	600927	69173530	0.0233	Total	561738	66295383	0.025
		RC	Other	18676	992950	0.0004	Other	16792	944063	0.0004	Other	20154	1242995	0.0004	Other	18870	1188476	0.0004
			Total	18676	992950	0.0004	Total	16792	944063	0.0004	Total	20154	1242995	0.0004	Total	18870	1188476	0.0004
		Total	-	782685	114942552	0.0433	-	620199	70911150	0.0266	-	634219	72107921	0.0243	-	593210	70776225	0.0267
	Total TEs		-	4487406	1173975390	0.4424	-	4542515	1179345891	0.4427	-	4495148	1187905646	0.3999	-	4210872	1117000769	0.422
Tandem Repeats	SSR		-	187226	2120673	0.0008	-	204074	2545491	0.001	-	187719	2127455	0.0007	-	178566	2022437	0.0008
	Tandem repeat		-	129617	9142207	0.0034	-	147638	10513483	0.0039	-	135150	21254306	0.0072	-	127299	11743657	0.0044
	Total TRs		-	316843	11262880	0.0042	-	351712	13058974	0.0049	-	322869	23381761	0.0079	-	305865	13766094	0.0052
Other			-	21715	9228562	0.0035	-	25109	12564429	0.0047	-	442971	281564008	0.0948	-	199486	108332969	0.0409
Unknown	/	/	-	16085	2299256	0.0009	-	40263	3606754	0.0014	-	11981	1806458	0.0006	-	23016	2700591	0.001
Simple repeats			-	26793	1706968	0.0006	-	23815	1533601	0.0006	-	27525	1785301	0.0006	-	25643	1674178	0.0006
Low complexity	/	/	-	118	21204	0	-	97	20282	0	-	108	18378	0	-	84	14505	0
Total Repeats			-	4868960	1198494260	0.4516	-	4983511	1210129931	0.4542	-	5300602	1496461552	0.5038	-	4764966	1243489106	0.4698

## Sheet: Table S5
Supplemental Table S5. Summary of annotated genes in the assemblies of Tibetan sheep, argali and the F1-hybrid.
Genome	Total number of genes	Average transcript length(bp)	Average CDS length(bp)	Average exons number per gene	Average exon length(bp)	Average intron length(bp)
Tibetan sheep O. aries	20919	47733.2	1616.64	9.37	172.45	5506.92
Argali O. ammon polii	20916	48631.9	1573.31	9.21	170.8	5730.78
The F1-hybrid (Ovis ammon polii × Ovis aries; n=27)	21078	47648.4	1765.16	9.18	192.21	5574.39
The F1-hybrid (Ovis ammon polii × Ovis aries; n=28)	20363	47170.6	1729.16	9.22	187.56	5557.52

## Sheet: Table S6
Supplemental Table S6. Statistics of non-coding RNA in the assemblies of Tibetan sheep, argali and the F1-hybrid.
Category	Type	Tibetan sheep O. aries				Argali O. ammon polii				The F1-hybrid (Ovis ammon polii × Ovis aries; n=27)				The F1-hybrid (Ovis ammon polii × Ovis aries; n=28)
		Copy Number	Average Length(bp)	Total Length(bp)	Percentage of sequence	Copy Number	Average Length(bp)	Total Length(bp)	Percentage of sequence	Copy Number	Average Length(bp)	Total Length(bp)	Percentage of sequence	Copy Number	Average Length(bp)	Total Length(bp)	Percentage of sequence
rRNA	18S	8	1844.75	14758	6e-06	16	1890.81	30253	1.1e-05	93	1865.95	173533	5.8e-05	18	1822.67	32808	1.2e-05
	28S	9	6354.11	57187	2.2e-05	16	7668	122688	4.6e-05	107	7421.48	794098	0.000267	23	6740.91	155041	5.9e-05
	5S	363	111.89	40617	1.5e-05	350	111.95	39184	1.5e-05	578	112.9	65258	2.2e-05	663	113.11	74992	2.8e-05
	5.8S	15	151.6	2274	1e-06	22	152.32	3351	1e-06	117	152.8	17878	6e-06	26	152.54	3966	1e-06
Small RNA	snRNA	662	114.74	75959	2.9e-05	657	115.31	75761	2.8e-05	676	115.57	78128	2.6e-05	637	114.61	73008	2.8e-05
	miRNA	770	79.69	61358	2.3e-05	790	79.49	62795	2.4e-05	856	80.46	68878	2.3e-05	713	78.87	56235	2.1e-05
	spliceosomal	1233	115.17	142006	5.4e-05	1225	114.2	139901	5.3e-05	1228	114.32	140384	4.7e-05	1195	114.72	137085	5.2e-05
	other	369	190.72	70377	2.7e-05	371	188.8	70046	2.6e-05	367	191.11	70137	2.4e-05	350	195.48	68417	2.6e-05
tRNA	tRNA	253239	73.23	18544404	0.006988	252153	73.23	18463999	0.00693	252924	73.23	18520824	0.006235	239766	73.23	17558317	0.006633
Regulatory	cis-regulatory elements	546	66.62	36374	1.4e-05	559	66.36	37095	1.4e-05	541	66.97	36231	1.2e-05	522	66.82	34880	1.3e-05

## Sheet: Table S7
Supplemental Table S7. Sample information of the 68 individuals for karyotyping (see Supplemental Figure S9).
Sample ID	Sex	Age	Generation	Chromosome number
Hybrid No.1	Female	Three years old	F1 backcrosses with Tibetan sheep	54
Hybrid No.2	Male	Two years old	F1 backcrosses with Tibetan sheep	54
Hybrid No.3	Female	Two years old	F1 backcrosses with Tibetan sheep	54
Hybrid No.4	Female	Two years old	F1 backcrosses with Tibetan sheep	54
Hybrid No.5	Male	Two years old	F1 backcrosses with Tibetan sheep	55
Hybrid No.6	Male	Five-month-old	-	54
Hybrid No.7	Male	Five-month-old	-	54
Hybrid No.8	Male	Six-month-old	-	54
Hybrid No.9	Female	Two years old	F1 backcrosses with Tibetan sheep	54
Hybrid No.10	Female	Five years old	-	55
Hybrid No.11	Female	Two years old	F1 backcrosses with Tibetan sheep	54
Hybrid No.12	Female	Five-month-old	F1 backcrosses with Tibetan sheep	54
Hybrid No.13	Female	Two years old	F1 backcrosses with Tibetan sheep	55
Hybrid No.14	Female	Two years old	F1 backcrosses with Tibetan sheep	54
Hybrid No.15	Female	Two years old	F1 backcrosses with Tibetan sheep	54
Hybrid No.16	Female	Two-month-old	-	54
Hybrid No.17	Male	Two years old	F1 backcrosses with Tibetan sheep	54
Hybrid No.18	Male	Four years old	-	54
Hybrid No.19	Female	Two-month-old	F1 backcrosses with Tibetan sheep	54
Hybrid No.20	Male	Two-month-old	F1 backcrosses with Tibetan sheep	54
Hybrid No.21	Female	Five years old	-	54
Hybrid No.22	Female	Three years old	F1 backcrosses with Tibetan sheep	54
Hybrid No.23	Female	Five years old	-	55
Hybrid No.24	Female	Five years old	-	54
Hybrid No.25	Female	Three years old	F1 backcrosses with Tibetan sheep	54
Hybrid No.26	Male	Three years old	F1 backcrosses with Tibetan sheep	55
Hybrid No.27	Male	Three years old	F1 backcrosses with Tibetan sheep	54
Hybrid No.28	Female	Two years old	F1 backcrosses with Tibetan sheep	55
Hybrid No.29	Male	Three years old	F1 backcrosses with Tibetan sheep	54
Hybrid No.30	Male	Three years old	F1 backcrosses with Tibetan sheep	55
Hybrid No.31	Male	Three years old	F1 backcrosses with Tibetan sheep	54
Hybrid No.32	Male	Three years old	F1 backcrosses with Tibetan sheep	54
Hybrid No.33	Female	Two-month-old	F1 backcrosses with Tibetan sheep	54
Hybrid No.34	Male	Two-month-old	F1 backcrosses with Tibetan sheep	54
Hybrid No.35	Female	Two-month-old	F1 backcrosses with Tibetan sheep	54
Hybrid No.36	Male	-	-	54
Hybrid No.37	Female	Four years old	F1 backcrosses with Tibetan sheep	54
Hybrid No.38	Female	Four years old	F1 backcrosses with Tibetan sheep	55
Hybrid No.39	Male	Four years old	F1 backcrosses with Tibetan sheep	54
Hybrid No.40	Male	Two years old	F1 backcrosses with Tibetan sheep	54
Hybrid No.41	Male	Two years old	F1 backcrosses with Tibetan sheep	54
Hybrid No.42	Female	Three years old	F1 backcrosses with Tibetan sheep	54
Hybrid No.43	Female	Three years old	F1 backcrosses with Tibetan sheep	54
Hybrid No.44	Female	Three years old	F1 backcrosses with Tibetan sheep	54
Hybrid No.45	Male	Three years old	F1 backcrosses with Tibetan sheep	54
Hybrid No.46	Male	Two years old	F1 backcrosses with Tibetan sheep	54
Hybrid No.47	Male	Three years old	F1 backcrosses with Tibetan sheep	55
Hybrid No.48	Female	Three years old	F1 backcrosses with Tibetan sheep	54
Hybrid No.49	Male	Three years old	F1 backcrosses with Tibetan sheep	54
Hybrid No.50	-	-	-	54
Hybrid No.51	-	-	-	54
Hybrid No.52	-	-	-	55
Hybrid No.53	-	-	-	54
Hybrid No.54	-	-	-	55
Hybrid No.55	-	-	-	55
Hybrid No.56	-	-	-	54
Hybrid No.57	-	-	-	54
Hybrid No.58	-	-	-	55
Hybrid No.59	-	-	-	55
Hybrid No.60	-	-	-	54
Hybrid No.61	-	-	-	54
Hybrid No.62	-	-	-	55
Hybrid No.63	-	-	-	54
Hybrid No.64	-	-	-	54
Hybrid No.65	-	-	-	54
Hybrid No.66	-	-	-	54
Hybrid No.67	-	-	-	55
Hybrid No.68	-	-	-	54

## Sheet: Table S8
Supplemental Table S8. Alignment results between chromosome 2 of Tibetan sheep and pesudochromosomes LG04 and LG07 in argali using the program NUCmer.
Tibetan sheep O. aries				Argali O. ammon polii				Identity
Chromosome	Start	End	Length	Pseudo-chromosome	Start	End	Length
2	4549	27037	22489	LG07	113346959	113369256	22298	95.82
2	18196	22369	4174	LG07	113371860	113375997	4138	97.54
2	19902	24185	4284	LG07	113361971	113366147	4177	95.12
2	40113	50302	10190	LG07	113370841	113360642	10200	97.3
2	44047	52589	8543	LG07	113376035	113367476	8560	97.7
2	52589	86417	33829	LG07	113360642	113326813	33830	99.65
2	86419	135801	49383	LG07	113326643	113277244	49400	99.39
2	135967	240565	104599	LG07	113277242	113172725	104518	99.19
2	240006	250803	10798	LG07	113171822	113160972	10851	96.63
2	250704	317597	66894	LG07	113160971	113094051	66921	98.57
2	316767	329984	13218	LG07	113095276	113082034	13243	97.48
2	330129	355924	25796	LG07	113082032	113056031	26002	98.72
2	356405	396928	40524	LG07	113056102	113015500	40603	99.07
2	396925	424627	27703	LG07	113015323	112987591	27733	99.05
2	424626	453203	28578	LG07	112987649	112959015	28635	98.79
2	454504	456995	2492	LG07	112957781	112955160	2622	88.38
2	455993	501075	45083	LG07	112955848	112910705	45144	98.4
2	501869	505212	3344	LG07	112910930	112907571	3360	96.38
2	505128	510610	5483	LG07	112907935	112902408	5528	95.08
2	510166	520299	10134	LG07	112902642	112892493	10150	97.3
2	520622	522147	1526	LG07	112892521	112890996	1526	97.97
2	522083	540796	18714	LG07	112891400	112872674	18727	98.59
2	541384	560035	18652	LG07	112872677	112854046	18632	98.98
2	559874	567830	7957	LG07	112854469	112846498	7972	97.64
2	567832	573137	5306	LG07	112846291	112840986	5306	99.34
2	573022	581781	8760	LG07	112841057	112832352	8706	98.35
2	581789	588622	6834	LG07	112832202	112825343	6860	97.88
2	591212	600824	9613	LG07	112822642	112813048	9595	97.88
2	600825	602176	1352	LG07	112781440	112782788	1349	97.19
2	601019	602371	1353	LG07	112812764	112811412	1353	98.23
2	602473	615864	13392	LG07	112811475	112798100	13376	98.06
2	615888	617858	1971	LG07	112797760	112795791	1970	97.32
2	617463	632698	15236	LG07	112795923	112780681	15243	97.96
2	630576	631742	1167	LG07	112811606	112812760	1155	96.57
2	632573	638030	5458	LG07	112780366	112775015	5352	95.32
2	637673	643506	5834	LG07	112775492	112769650	5843	96.29
2	651135	670557	19423	LG07	112770054	112750593	19462	97.8
2	670559	708690	38132	LG07	112750462	112712383	38080	98.28
2	710346	716177	5832	LG07	112711095	112705250	5846	97.23
2	715920	743068	27149	LG07	112705362	112678293	27070	98.2
2	722237	728860	6624	LG04	62983676	62977042	6635	98.81
2	743409	750408	7000	LG07	112678353	112671384	6970	98.41
2	751734	759974	8241	LG07	112671452	112663180	8273	97.48
2	760496	765394	4899	LG07	112663184	112658325	4860	96.96
2	765128	766295	1168	LG07	112658412	112657246	1167	97.01
2	766530	770776	4247	LG07	112651109	112646845	4265	97.56
2	770862	783902	13041	LG07	112646885	112633845	13041	99.1
2	783848	799948	16101	LG07	112633845	112617753	16093	98.28
2	799762	804602	4841	LG07	112618023	112613172	4852	96.33
2	803990	804747	758	LG07	112613383	112612631	753	98.55
2	805840	810924	5085	LG07	112611866	112606783	5084	93.72
2	810682	842018	31337	LG07	112607110	112575886	31225	98.07
2	842134	844520	2387	LG07	112575886	112573521	2366	95.87
2	844566	854442	9877	LG07	112574001	112564144	9858	97.61
2	854517	869523	15007	LG07	112563898	112548893	15006	99.02
2	869491	890524	21034	LG07	112548547	112527503	21045	98.81
2	891246	896185	4940	LG07	112527548	112522629	4920	98.28
2	896185	904984	8800	LG07	112522391	112513581	8811	97.84
2	904865	941562	36698	LG07	112513580	112477069	36512	98.46
2	941562	942684	1123	LG07	112476954	112475835	1120	96
2	942667	976350	33684	LG07	112476078	112442371	33708	98.67
2	976350	983470	7121	LG07	112442414	112435292	7123	99.4
2	983367	989114	5748	LG07	112435344	112429569	5776	98.46
2	989493	1006479	16987	LG07	112429964	112413022	16943	98.84
2	1006481	1011534	5054	LG07	112413073	112408015	5059	99.39
2	1011754	1028667	16914	LG07	112408017	112391060	16958	98.69
2	1028667	1032609	3943	LG07	112390948	112387008	3941	96.55
2	1032455	1044778	12324	LG07	112387731	112375425	12307	98.42
2	1045028	1061381	16354	LG07	112375368	112358963	16406	98.67
2	1061144	1077316	16173	LG07	112359388	112343223	16166	98.99
2	1077318	1083154	5837	LG07	112343117	112337269	5849	99.11
2	1083027	1084174	1148	LG07	112337576	112336429	1148	97.13
2	1084242	1090711	6470	LG07	112336472	112330007	6466	99.04
2	1091377	1115842	24466	LG07	112329549	112305072	24478	98.28
2	1115512	1178622	63111	LG07	112305204	112242041	63164	98.71
2	1177896	1188469	10574	LG07	112242008	112231531	10478	96.17
2	1187454	1206552	19099	LG07	112232915	112213937	18979	96.61
2	1207674	1228870	21197	LG07	112212816	112191675	21142	98.71
2	1228870	1252435	23566	LG07	112191557	112167940	23618	97.47
2	1252517	1287252	34736	LG07	112167441	112132782	34660	98.68
2	1287378	1296786	9409	LG07	112132782	112123437	9346	97.93
2	1296786	1300091	3306	LG07	112123245	112119997	3249	97.1
2	1300101	1392800	92700	LG07	112119086	112026394	92693	98.54
2	1392296	1402578	10283	LG07	112026853	112016562	10292	98.21
2	1410679	1427589	16911	LG07	112016834	111999927	16908	99.31
2	1428479	1447865	19387	LG07	111999995	111980575	19421	99.02
2	1447646	1451128	3483	LG07	111980460	111976977	3484	97.45
2	1451048	1452719	1672	LG07	111977242	111975564	1679	93.22
2	1452341	1468958	16618	LG07	111976167	111959569	16599	97.62
2	1469359	1528178	58820	LG07	111959569	111900763	58807	98.03
2	1530123	1531159	1037	LG07	111898519	111897483	1037	98.17
2	1531880	1535219	3340	LG07	111895194	111891858	3337	97.46
2	1535316	1537591	2276	LG07	111891858	111889578	2281	97.03
2	1538558	1574022	35465	LG07	111888861	111853518	35344	98.35
2	1574325	1578735	4411	LG07	111853052	111848611	4442	97.51
2	1578648	1593360	14713	LG07	111848494	111833737	14758	97.98
2	1593360	1615646	22287	LG07	111833311	111811074	22238	98.61
2	1614542	1622684	8143	LG07	111812416	111804266	8151	95.27
2	1622311	1636783	14473	LG07	111804419	111789944	14476	98.15
2	1637644	1659994	22351	LG07	111789512	111767216	22297	98.07
2	1659966	1668028	8063	LG07	111766941	111758924	8018	97.5
2	1668003	1669495	1493	LG07	111759099	111757601	1499	95.56
2	1669495	1676791	7297	LG07	111757063	111749712	7352	95.79
2	1676380	1705051	28672	LG07	111750000	111721328	28673	97.57
2	1705226	1733940	28715	LG07	111721328	111692516	28813	98.38
2	1735562	1768669	33108	LG07	111690864	111657719	33146	97.92
2	1768132	1787602	19471	LG07	111657613	111638128	19486	96.95
2	1788188	1807341	19154	LG07	111624974	111605809	19166	98.58
2	1807341	1810680	3340	LG07	111605714	111602406	3309	98.15
2	1810810	1823135	12326	LG07	111602389	111590122	12268	98.44
2	1822901	1848149	25249	LG07	111590198	111564923	25276	98.03
2	1847974	1858188	10215	LG07	111564981	111554724	10258	96.51
2	1858352	1883246	24895	LG07	111554724	111529819	24906	99.04
2	1883249	1913544	30296	LG07	111529628	111499208	30421	97.67
2	1913644	1917075	3432	LG07	111499372	111495961	3412	98.11
2	1917073	1930475	13403	LG07	111495791	111482392	13400	98.33
2	1933149	1937884	4736	LG07	111479662	111474978	4685	97.68
2	1937883	1944326	6444	LG07	111475029	111468589	6441	99.29
2	1944302	1987658	43357	LG07	111468651	111425279	43373	98.33
2	1987504	1999083	11580	LG07	111425069	111413517	11553	97.36
2	2000695	2037510	36816	LG07	111410964	111374274	36691	98.73
2	2037504	2048698	11195	LG07	111374365	111363255	11111	97.27
2	2049683	2096151	46469	LG07	111362158	111315539	46620	98.32
2	2095805	2158972	63168	LG07	111311845	111248607	63239	98.34
2	2159717	2170988	11272	LG07	111249208	111237921	11288	96.74
2	2170678	2177754	7077	LG07	111238071	111230997	7075	99.12
2	2177757	2191334	13578	LG07	111230894	111217352	13543	98.55
2	2191366	2242950	51585	LG07	111217544	111165992	51553	99.3
2	2242928	2286270	43343	LG07	111165976	111122578	43399	98.76
2	2286144	2319756	33613	LG07	111122406	111088761	33646	98.35
2	2319756	2334999	15244	LG07	111088658	111073389	15270	98.28
2	2335155	2426414	91260	LG07	111073389	110982269	91121	98.72
2	2426592	2501155	74564	LG07	110982262	110907725	74538	99.2
2	2501156	2502907	1752	LG07	110907577	110905826	1752	99.09
2	2502854	2561137	58284	LG07	110905636	110847343	58294	98.88
2	2561137	2569573	8437	LG07	110847222	110838785	8438	98.82
2	2569587	2610359	40773	LG07	110838651	110797814	40838	98.85
2	2610361	2625906	15546	LG07	110797668	110782105	15564	98.65
2	2625906	2803083	177178	LG07	110781989	110604702	177288	99.09
2	2803005	2886141	83137	LG07	110604702	110521578	83125	99
2	2886033	3076897	190865	LG07	110521427	110330530	190898	98.76
2	3076897	3117339	40443	LG07	110330433	110289985	40449	97.58
2	3114332	3139740	25409	LG07	110293179	110267815	25365	97.21
2	3139729	3226915	87187	LG07	110267932	110180643	87290	98.71
2	3226820	3235881	9062	LG07	110180623	110171577	9047	99.01
2	3235881	3303779	67899	LG07	110171203	110103478	67726	97.79
2	3303901	3306683	2783	LG07	110103478	110100698	2781	94.48
2	3307931	3326471	18541	LG07	110101764	110083321	18444	97.84
2	3326396	3376335	49940	LG07	110083322	110033432	49891	98.52
2	3376258	3395748	19491	LG07	110033182	110013703	19480	98.54
2	3395732	3482755	87024	LG07	110013262	109926302	86961	98.47
2	3482713	3572603	89891	LG07	109923602	109833680	89923	98.81
2	3572495	3612853	40359	LG07	109833929	109793581	40349	98.56
2	3612728	3613915	1188	LG07	109793860	109792673	1188	98.32
2	3613912	3670742	56831	LG07	109792554	109735738	56817	99.12
2	3670742	3684463	13722	LG07	109735454	109721770	13685	98.53
2	3684572	3690378	5807	LG07	109721768	109715948	5821	99.21
2	3690270	3703031	12762	LG07	109715936	109703161	12776	98.98
2	3703031	3753382	50352	LG07	109703054	109652667	50388	98.55
2	3753383	3754688	1306	LG04	136045106	136043801	1306	99.16
2	3754689	3797865	43177	LG07	109652677	109609642	43036	98.66
2	3797986	3844490	46505	LG07	109609640	109563055	46586	98.76
2	3844488	3879409	34922	LG07	109563008	109527999	35010	98.73
2	3879409	3972737	93329	LG07	109527897	109434579	93319	98.91
2	3973512	4017995	44484	LG07	109434568	109390075	44494	98.92
2	4019083	4066031	46949	LG07	109388748	109341764	46985	98.75
2	4065963	4086297	20335	LG07	109341688	109321367	20322	98.29
2	4086384	4114413	28030	LG07	109321367	109293336	28032	98.89
2	4114553	4135278	20726	LG07	109293336	109272572	20765	98.34
2	4134207	4252900	118694	LG07	109271575	109152759	118817	98.83
2	4252768	4281119	28352	LG07	109152752	109124343	28410	98.71
2	4280590	4568346	287757	LG07	109124534	108836646	287889	98.68
2	4568346	4652349	84004	LG07	108835782	108751877	83906	98.62
2	4654879	4674827	19949	LG07	108751887	108731904	19984	99.24
2	4682609	4790071	107463	LG07	108731917	108624321	107597	98.69
2	4790948	4793686	2739	LG07	108624338	108621600	2739	98.83
2	4793897	4831457	37561	LG07	108621586	108584043	37544	99.07
2	4831440	4993007	161568	LG07	108583854	108422286	161569	98.78
2	4993016	5077039	84024	LG07	108421853	108337819	84035	99.03
2	5077205	5183389	106185	LG07	108337899	108231772	106128	98.97
2	5184280	5211449	27170	LG07	108231779	108204544	27236	98.69
2	5211554	5248647	37094	LG07	108204685	108167643	37043	98.26
2	5250405	5297155	46751	LG07	108166399	108119613	46787	98.68
2	5253551	5255464	1914	LG07	108154464	108156368	1905	93.94
2	5297409	5325681	28273	LG07	108119614	108091362	28253	98.77
2	5325678	5331782	6105	LG07	108091144	108085070	6075	98.94
2	5331767	5372024	40258	LG07	108084443	108044204	40240	98.86
2	5372854	5424379	51526	LG07	108044219	107992685	51535	99.05
2	5424405	5574748	150344	LG07	107992802	107842346	150457	98.9
2	5574790	5584896	10107	LG07	107842375	107832267	10109	98.98
2	5585762	5610020	24259	LG07	107832281	107808040	24242	98.7
2	5610537	5612127	1591	LG04	33801424	33803015	1592	99.5
2	5612118	5612734	617	LG07	107808055	107807439	617	99.19
2	5615204	5728043	112840	LG07	107807454	107694573	112882	99.25
2	5728043	5769711	41669	LG07	107694435	107652776	41660	98.93
2	5769700	5830168	60469	LG07	107652241	107591821	60421	98.63
2	5830168	5838186	8019	LG07	107591719	107583706	8014	98.69
2	5838347	5891261	52915	LG07	107583706	107530693	53014	98.54
2	5891531	5945846	54316	LG07	107530700	107476432	54269	99.33
2	5946829	5989490	42662	LG07	107474626	107431979	42648	99.18
2	5989617	6011146	21530	LG07	107431979	107410463	21517	98.99
2	6012145	6018289	6145	LG07	107410464	107404322	6143	98.85
2	6018344	6077902	59559	LG07	107404353	107344820	59534	98.91
2	6078071	6176130	98060	LG07	107344879	107246785	98095	98.84
2	6176105	6202810	26706	LG07	107246210	107219544	26667	99.15
2	6202811	6292392	89582	LG07	107218766	107129175	89592	99.03
2	6292391	6417523	125133	LG07	107128391	107003279	125113	98.96
2	6417508	6436843	19336	LG07	107003203	106983876	19328	98.57
2	6436695	6463239	26545	LG07	106984189	106957638	26552	98.94
2	6463239	6536809	73571	LG07	106957524	106883963	73562	98.95
2	6536697	6643845	107149	LG07	106883945	106776715	107231	98.66
2	6643840	6726580	82741	LG07	106776785	106694053	82733	98.9
2	6727745	6745470	17726	LG07	106694068	106676299	17770	98.16
2	6745451	6762204	16754	LG07	106676696	106659951	16746	98.77
2	6762113	6774616	12504	LG07	106659998	106647505	12494	98.87
2	6775469	7080160	304692	LG07	106647517	106342470	305048	98.79
2	7080155	7082141	1987	LG07	106342339	106340354	1986	99.19
2	7082336	7159404	77069	LG07	106340362	106263319	77044	98.94
2	7161105	7271772	110668	LG07	106263136	106152415	110722	99.06
2	7272298	7363020	90723	LG07	106152400	106061715	90686	99.08
2	7362857	7388998	26142	LG07	106061932	106035780	26153	99.12
2	7388998	7406582	17585	LG07	106035674	106018073	17602	99.09
2	7406570	7498301	91732	LG07	106018045	105926304	91742	98.91
2	7498444	7766143	267700	LG07	105926304	105658577	267728	99.01
2	7765789	7860736	94948	LG07	105658819	105563800	95020	99.28
2	7862124	7880665	18542	LG07	105563812	105545248	18565	98.84
2	7880665	8007334	126670	LG07	105545117	105418536	126582	99.25
2	8007340	8088666	81327	LG07	105417050	105335674	81377	99.13
2	8089597	8122493	32897	LG07	105335690	105302718	32973	99.04
2	8122493	8124341	1849	LG07	105302616	105300768	1849	99.46
2	8124326	8250634	126309	LG07	105300360	105174089	126272	99.43
2	8250656	8256237	5582	LG07	105174106	105168558	5549	98.91
2	8256220	8263580	7361	LG07	105167511	105160156	7356	99.29
2	8263559	8275915	12357	LG07	105159712	105147358	12355	99.03
2	8275916	8280776	4861	LG07	105147395	105142509	4887	98.92
2	8280771	8309227	28457	LG07	105140873	105112446	28428	99.02
2	8309729	8394394	84666	LG07	105112454	105027735	84720	98.85
2	8395604	8446318	50715	LG07	105027750	104977006	50745	98.94
2	8446416	8447499	1084	LG07	31645860	31644778	1083	98.99
2	8446418	8447495	1078	LG04	42385780	42386856	1077	98.89
2	8447498	8453567	6070	LG07	104977019	104970939	6081	98.19
2	8453786	8463141	9356	LG07	104970953	104961596	9358	98.53
2	8463352	8711828	248477	LG07	104961582	104713297	248286	98.89
2	8712099	8718291	6193	LG07	104713297	104707111	6187	99.14
2	8718290	8736654	18365	LG07	104707150	104688805	18346	98.7
2	8736748	8893799	157052	LG07	104688805	104531582	157224	98.78
2	8893808	8959020	65213	LG07	104531477	104466226	65252	98.98
2	8959221	8962741	3521	LG07	104466224	104462694	3531	98.81
2	8964029	8978734	14706	LG07	104462701	104448089	14613	98.2
2	8979236	9010412	31177	LG07	104448086	104416848	31239	98.64
2	9010913	9035574	24662	LG07	104416847	104392192	24656	99.13
2	9035574	9040706	5133	LG07	104391996	104386884	5113	98.19
2	9040795	9137166	96372	LG07	104386884	104290583	96302	99.51
2	9138878	9471452	332575	LG07	104290593	103957783	332811	98.95
2	9471588	9664142	192555	LG07	103957781	103765164	192618	99.26
2	9664254	9746171	81918	LG07	103765162	103683277	81886	98.91
2	9746173	9778761	32589	LG07	103683170	103650599	32572	98.75
2	9778854	9787844	8991	LG07	103650599	103641597	9003	98.91
2	9787847	9799308	11462	LG07	103641475	103630045	11431	98.81
2	9799777	9962951	163175	LG07	103630045	103466954	163092	99.08
2	9963120	9978707	15588	LG07	103466981	103451406	15576	98.92
2	9978691	10038215	59525	LG07	103450811	103391273	59539	98.94
2	10038219	10192486	154268	LG07	103391125	103236823	154303	98.95
2	10192488	10267597	75110	LG07	103236658	103161473	75186	99.09
2	10267358	10402181	134824	LG07	103161593	103026770	134824	99.3
2	10402301	10420102	17802	LG07	103026768	103008976	17793	99.49
2	10420408	10535419	115012	LG07	103008991	102893916	115076	99.29
2	10521013	10552460	31448	LG07	102894178	102862741	31438	99.26
2	10552463	10610524	58062	LG07	102862609	102804539	58071	99.13
2	10610504	10687313	76810	LG07	102804499	102727688	76812	99.12
2	10691776	10849938	158163	LG07	102722710	102564503	158208	99.04
2	10697613	10701722	4110	LG07	102701684	102705794	4111	96.92
2	10708720	10712834	4115	LG07	102712799	102716903	4105	96.68
2	10851045	10885037	33993	LG07	102564506	102530431	34076	98.37
2	10885151	11062221	177071	LG07	102530430	102353425	177006	99.07
2	11062222	11371764	309543	LG07	102353566	102044016	309551	99.32
2	11371766	11407029	35264	LG07	102043617	102008371	35247	99.44
2	11407029	11411773	4745	LG07	102008033	102003292	4742	99.12
2	11411762	11520159	108398	LG07	102002797	101894381	108417	99.06
2	11520039	11662823	142785	LG07	101894620	101751793	142828	99.07
2	11669620	11681450	11831	LG07	101751792	101739974	11819	99.06
2	11681701	11990898	309198	LG07	101739974	101430754	309221	99.22
2	11864392	11866046	1655	LG07	101527394	101529041	1648	95.24
2	11892661	11894296	1636	LG07	101555688	101557333	1646	94.8
2	11991034	11999106	8073	LG07	101430754	101422676	8079	99.1
2	11999106	12070918	71813	LG07	101421824	101350027	71798	99
2	12070921	12077750	6830	LG07	101346337	101339508	6830	99.41
2	12078269	12156803	78535	LG07	101339658	101261247	78412	99
2	12157306	12282201	124896	LG07	101261248	101136410	124839	98.73
2	12281037	12414660	133624	LG07	101134899	101001332	133568	99.09
2	12416502	12445551	29050	LG07	101003060	100973911	29150	98.46
2	12445515	12486097	40583	LG07	100973910	100933343	40568	99.16
2	12486237	12520847	34611	LG07	100933460	100898815	34646	98.82
2	12521261	12526584	5324	LG07	100898940	100893619	5322	99.12
2	12527345	12647747	120403	LG07	100893621	100773088	120534	98.89
2	12648617	12650395	1779	LG07	100773100	100771325	1776	98.26
2	12650432	12701838	51407	LG07	100771399	100719945	51455	98.39
2	12703492	12867780	164289	LG07	100719951	100555380	164572	98.99
2	12867781	12915980	48200	LG07	100555270	100507128	48143	98.49
2	12916268	13061920	145653	LG07	100507128	100361343	145786	99.2
2	12947082	12948737	1656	LG07	32446280	32447941	1662	98.5
2	13061904	13238695	176792	LG07	100360636	100183855	176782	98.7
2	13238727	13539950	301224	LG07	100183981	99882701	301281	99.13
2	13539952	13553548	13597	LG07	99882496	99868891	13606	99.47
2	13553552	13563327	9776	LG07	99868783	99859007	9777	98.7
2	13563650	13587678	24029	LG07	99857705	99833653	24053	98.95
2	13588149	13592904	4756	LG07	99833646	99828879	4768	97.8
2	13593417	13595539	2123	LG07	99828894	99826793	2102	97.74
2	13595525	13659706	64182	LG07	99824800	99760620	64181	99.36
2	13659665	13712378	52714	LG07	99759555	99706871	52685	99.19
2	13713027	13725200	12174	LG07	99706884	99694700	12185	98.75
2	13725369	13775966	50598	LG07	99694700	99644087	50614	99.16
2	13776844	14015703	238860	LG07	99644092	99405310	238783	99.12
2	14015580	14070305	54726	LG07	99405114	99350344	54771	99.3
2	14070182	14102541	32360	LG07	99350585	99318235	32351	99.6
2	14102653	14255510	152858	LG07	99318235	99165372	152864	99.19
2	14255407	14326806	71400	LG07	99165372	99094005	71368	99.46
2	14326948	14362956	36009	LG07	99094005	99058003	36003	99.1
2	14363960	14684662	320703	LG07	99057988	98737464	320525	99.26
2	14683917	14704510	20594	LG07	98738322	98717730	20593	98.94
2	14704497	14785587	81091	LG07	98716088	98635032	81057	99.59
2	14785584	14912928	127345	LG07	98633206	98506033	127174	98.78
2	14910937	14913366	2430	LG07	98508924	98506465	2460	89.8
2	14913517	14951835	38319	LG07	98506459	98468129	38331	99.27
2	14951871	14952986	1116	LG07	98468141	98467026	1116	99.28
2	14953091	14970684	17594	LG07	98467025	98449408	17618	98.21
2	14970692	14982220	11529	LG07	98449210	98437704	11507	97.72
2	14982590	15073028	90439	LG07	98437329	98346858	90472	98.99
2	15073014	15076607	3594	LG07	98343488	98339893	3596	99.22
2	15076594	15249870	173277	LG07	98338680	98165429	173252	98.99
2	15249866	15490264	240399	LG07	98165223	97924939	240285	99.15
2	15490359	15507442	17084	LG07	97924955	97907919	17037	99.17
2	15507322	15533389	26068	LG07	97907915	97881827	26089	99.13
2	15533489	15783763	250275	LG07	97881374	97631020	250355	98.93
2	15783959	16073615	289657	LG07	97631020	97341210	289811	99.11
2	16073800	16080587	6788	LG07	97341210	97334434	6777	98.82
2	16080675	16208016	127342	LG07	97334434	97207075	127360	99.13
2	16208135	16399953	191819	LG07	97207075	97015267	191809	99.35
2	16400194	16523967	123774	LG07	97015256	96891441	123816	98.95
2	16525519	16527274	1756	LG07	41299948	41298193	1756	99.72
2	16527273	16569976	42704	LG07	96891459	96848786	42674	99.09
2	16570109	16579276	9168	LG07	96848781	96839620	9162	98.66
2	16579255	16720892	141638	LG07	96836431	96694766	141666	99.3
2	16723841	16730681	6841	LG07	96694801	96687960	6842	99.58
2	16730847	16842322	111476	LG07	96687951	96576473	111479	98.98
2	16842593	16896235	53643	LG07	96576487	96522844	53644	98.97
2	16896220	16916166	19947	LG07	96519842	96499893	19950	99.44
2	16916174	17027192	111019	LG07	96499781	96388774	111008	99.01
2	17027576	17054215	26640	LG07	96388105	96361483	26623	99.06
2	17054215	17214378	160164	LG07	96361390	96201189	160202	99.3
2	17214378	17253343	38966	LG07	96201079	96162166	38914	99.39
2	17253459	17330370	76912	LG07	96162166	96085324	76843	98.83
2	17329121	17383745	54625	LG07	96088152	96033598	54555	98.8
2	17383730	17400804	17075	LG07	96031050	96013972	17079	99.67
2	17400807	17415841	15035	LG07	96014190	95999152	15039	99.38
2	17416303	17456059	39757	LG07	95999167	95959370	39798	99.32
2	17456316	17523190	66875	LG07	95959447	95892640	66808	99.16
2	17523189	17640811	117623	LG07	95891615	95774106	117510	98.79
2	17640812	17655755	14944	LG07	95774253	95759313	14941	98.41
2	17656048	17736836	80789	LG07	95759405	95678651	80755	99.37
2	17736981	17757014	20034	LG07	95678650	95658635	20016	98.91
2	17757014	17982229	225216	LG07	95658516	95433215	225302	99.25
2	17982321	18014170	31850	LG07	95433214	95401383	31832	99.12
2	18014388	18131417	117030	LG07	95401376	95284283	117094	99.24
2	18131401	18365263	233863	LG07	95283004	95049255	233750	99.15
2	18367632	18408783	41152	LG07	95049270	95008162	41109	98.37
2	18409267	18422165	12899	LG07	95008172	94995300	12873	98.21
2	18422165	18443700	21536	LG07	94994964	94973445	21520	99.01
2	18443709	18447464	3756	LG04	74260138	74256381	3758	99.57
2	18448591	18454962	6372	LG07	94973460	94967083	6378	99.47
2	18458227	18466379	8153	LG07	94967098	94958951	8148	99.22
2	18466382	18476764	10383	LG07	94958843	94948478	10366	99.08
2	18477422	18513587	36166	LG07	94948478	94912306	36173	99.21
2	18521401	18527280	5880	LG07	94912321	94906441	5881	99.78
2	18527318	18532027	4710	LG07	94906451	94901749	4703	99.49
2	18532025	18585858	53834	LG07	94901667	94847848	53820	99.5
2	18587705	18612963	25259	LG07	94847863	94822618	25246	98.52
2	18613079	18724261	111183	LG07	94822618	94711372	111247	99.05
2	18682201	18683433	1233	LG07	94752172	94753404	1233	88.95
2	18727323	18741852	14530	LG07	94711365	94696855	14511	99.14
2	18741852	18779710	37859	LG07	94696690	94658786	37905	98.98
2	18779706	18947866	168161	LG07	94658592	94490401	168192	98.82
2	18947878	19004575	56698	LG07	94490285	94433626	56660	98.9
2	19004671	19015201	10531	LG07	94432476	94421905	10572	99.05
2	19015195	19066760	51566	LG07	94421193	94369655	51539	98.86
2	19066863	19192172	125310	LG07	94369645	94244164	125482	98.6
2	19192327	19202523	10197	LG07	94244156	94233972	10185	99.25
2	19208699	19250358	41660	LG07	94233977	94192236	41742	98.77
2	19250342	19262445	12104	LG07	94189667	94177570	12098	99.42
2	19262726	19294885	32160	LG07	94177576	94145409	32168	99.43
2	19294885	19387364	92480	LG07	94145195	94052595	92601	98.72
2	19388278	19425750	37473	LG07	94052590	94015138	37453	98.7
2	19428360	19435987	7628	LG07	94015154	94007513	7642	98.45
2	19435981	19467080	31100	LG07	94007030	93975911	31120	99.32
2	19467962	19555860	87899	LG07	93975900	93887972	87929	98.45
2	19555866	19709829	153964	LG07	93886764	93732881	153884	98.92
2	19710461	19780811	70351	LG07	93732884	93662536	70349	99.21
2	19780811	19815295	34485	LG07	93662333	93627842	34492	98.82
2	19815297	19864606	49310	LG07	93627345	93578094	49252	98.89
2	19864947	19875986	11040	LG07	93576921	93565863	11059	98.03
2	19875987	19897369	21383	LG07	93565571	93544154	21418	99.32
2	19897370	19923123	25754	LG07	93543857	93518158	25700	98.95
2	19923110	19933731	10622	LG07	93517772	93507149	10624	99.17
2	19940468	20012901	72434	LG07	93501471	93428995	72477	99.26
2	20012887	20016374	3488	LG07	93426267	93422748	3520	98.78
2	20019959	20069930	49972	LG07	93422762	93372812	49951	98.76
2	20072654	20110105	37452	LG07	93371261	93333744	37518	99.08
2	20104090	20104716	627	LG04	113825503	113826130	628	99.36
2	20113077	20204612	91536	LG07	93333757	93242123	91635	98.66
2	20204997	20259809	54813	LG07	93242123	93187229	54895	98.95
2	20259800	20311164	51365	LG07	93187200	93135722	51479	99.42
2	20289858	20296000	6143	LG07	93099938	93106073	6136	97.35
2	20311168	20372612	61445	LG07	93135569	93074156	61414	98.93
2	20373494	20399883	26390	LG07	93073263	93046822	26442	98.33
2	20400745	20407868	7124	LG07	93046833	93039686	7148	98.38
2	20409133	20470068	60936	LG07	93039696	92978720	60977	99.31
2	20470055	20484703	14649	LG07	92976498	92961847	14652	99.65
2	20484998	20496799	11802	LG07	92961851	92950048	11804	99.5
2	20497019	20506442	9424	LG07	92950046	92940562	9485	97.92
2	20506440	20508713	2274	LG07	92939720	92937439	2282	98.25
2	20508709	20515068	6360	LG07	92936945	92930597	6349	98.26
2	20515220	20519652	4433	LG07	92930597	92926140	4458	98.09
2	20519657	20528670	9014	LG07	92926042	92917032	9011	99.01
2	20528656	20549095	20440	LG07	92916038	92895601	20438	98.89
2	20549094	20596251	47158	LG07	92895220	92848073	47148	99.21
2	20596356	20622234	25879	LG07	92847952	92822114	25839	98.71
2	20622222	20672936	50715	LG07	92820278	92769648	50631	98.3
2	20673074	20681730	8657	LG07	92769648	92760985	8664	98.43
2	20681978	20689678	7701	LG07	92760997	92753278	7720	97.23
2	20689663	20721409	31747	LG07	92745558	92713882	31677	98.59
2	20721411	20723431	2021	LG07	92711645	92709632	2014	98.81
2	20723423	20741841	18419	LG07	92707948	92689542	18407	98.13
2	20743119	20747238	4120	LG07	92687141	92683017	4125	98.57
2	20748033	20760997	12965	LG07	92682728	92669769	12960	98.7
2	20760999	20789072	28074	LG07	92669267	92641165	28103	97.98
2	20789971	20798595	8625	LG07	92641166	92632527	8640	98.3
2	20798750	20802248	3499	LG07	92632527	92629027	3501	99
2	20802236	20838143	35908	LG07	92627194	92591352	35843	97.78
2	20838749	20856361	17613	LG07	92591718	92574122	17597	98.47
2	20856595	20890765	34171	LG07	92574129	92539970	34160	99.04
2	20890760	20916884	26125	LG07	92539849	92513694	26156	99.08
2	20916884	20929503	12620	LG07	92513565	92500975	12591	98.92
2	20929892	20958723	28832	LG07	92500976	92472049	28928	98.15
2	20959952	20972560	12609	LG07	92472063	92459455	12609	98.87
2	20974503	20989109	14607	LG07	92457251	92442642	14610	98.58
2	20989093	21079185	90093	LG07	92441101	92351044	90058	99.1
2	21079172	21144258	65087	LG07	92343334	92278125	65210	98.84
2	21144400	21181466	37067	LG07	92278125	92241029	37097	98.66
2	21181465	21189193	7729	LG07	28589656	28581930	7727	98.79
2	21181469	21189192	7724	LG04	74252416	74260138	7723	98.33
2	21189263	21256267	67005	LG07	92241042	92174126	66917	99.08
2	21256257	21298949	42693	LG07	92173752	92131019	42734	98.66
2	21299287	21312331	13045	LG07	92131032	92117966	13067	99.4
2	21313213	21318906	5694	LG07	92117978	92112290	5689	99.44
2	21319440	21334259	14820	LG07	92110667	92095843	14825	99.27
2	21334246	21345408	11163	LG07	92095019	92083843	11177	99.47
2	21345390	21436137	90748	LG07	92082413	91991617	90797	98.68
2	21437237	21462575	25339	LG07	91991631	91966257	25375	98.88
2	21462666	21644256	181591	LG07	91964375	91782745	181631	99.04
2	21644259	21679969	35711	LG07	91782324	91746604	35721	99.09
2	21679793	21736277	56485	LG07	91746509	91690025	56485	98.49
2	21736283	21871029	134747	LG07	91689053	91554170	134884	98.94
2	21871022	21875933	4912	LG07	91552640	91547733	4908	97.52
2	21877537	21951081	73545	LG07	91547730	91474074	73657	98.68
2	21951069	21987099	36031	LG07	91473562	91437498	36065	98.84
2	21987101	21997452	10352	LG07	91437368	91427033	10336	98.93
2	21997661	22019213	21553	LG07	91427048	91405433	21616	98.93
2	22019214	22032362	13149	LG07	91405328	91392160	13169	99.17
2	22032347	22065661	33315	LG07	91391319	91357996	33324	98.98
2	22065648	22099548	33901	LG07	91355845	91321950	33896	98.75
2	22099534	22109180	9647	LG07	91321657	91312025	9633	99.02
2	22109179	22164740	55562	LG07	91311681	91256080	55602	98.89
2	22165238	22315510	150273	LG07	91256092	91105840	150253	99.01
2	22315512	22325773	10262	LG07	91105700	91095437	10264	99.07
2	22325758	22339040	13283	LG07	91095190	91081907	13284	99.09
2	22339040	22359588	20549	LG07	91081493	91060911	20583	98.53
2	22359581	22360667	1087	LG07	91060613	91059526	1088	99.17
2	22360668	22365087	4420	LG07	91059426	91055033	4394	99.05
2	22366224	22391273	25050	LG07	91055041	91029981	25061	98.8
2	22391525	22409977	18453	LG07	91029967	91011479	18489	98.46
2	22409971	22431084	21114	LG07	91010673	90989559	21115	98.85
2	22431423	22450893	19471	LG07	90989559	90970150	19410	98.34
2	22450878	22454206	3329	LG07	90969958	90966626	3333	98.77
2	22454208	22460837	6630	LG07	90964757	90958100	6658	98.29
2	22460837	22461610	774	LG04	83233926	83233156	771	99.1
2	22464096	22524200	60105	LG07	90957982	90897989	59994	98.78
2	22524184	22526483	2300	LG07	90897866	90895564	2303	98.52
2	22526469	22580408	53940	LG07	90887801	90833879	53923	98.65
2	22580484	22725320	144837	LG07	90834258	90689348	144911	98.72
2	22725462	22806833	81372	LG07	90689350	90607999	81352	99.27
2	22806486	23124993	318508	LG07	90607528	90288823	318706	99.01
2	23125568	23210643	85076	LG07	90288829	90203710	85120	99.05
2	23210669	23250456	39788	LG07	90203725	90163932	39794	99.07
2	23250456	23332974	82519	LG07	90163829	90081279	82551	99.27
2	23333144	23376681	43538	LG07	90081281	90037691	43591	99.2
2	23376668	23413013	36346	LG07	90034355	89998079	36277	98.47
2	23413011	23434996	21986	LG07	89997941	89975922	22020	98.68
2	23435710	23481734	46025	LG07	89975934	89929853	46082	98.66
2	23481721	23542941	61221	LG07	89924159	89862895	61265	98.75
2	23542937	23615398	72462	LG07	89862344	89789879	72466	98.9
2	23615392	23669691	54300	LG07	89788580	89734157	54424	98.41
2	23671193	23731852	60660	LG07	89734165	89673610	60556	99.12
2	23734087	23739584	5498	LG07	89673611	89668088	5524	97.79
2	23739989	23742894	2906	LG07	89666206	89663320	2887	98.66
2	23742797	23753752	10956	LG07	89663321	89652361	10961	98.49
2	23754394	24014933	260540	LG07	89652350	89391904	260447	99.02
2	24015448	24132404	116957	LG07	89391909	89274918	116992	98.98
2	24132390	24157584	25195	LG07	89273589	89248376	25214	98.5
2	24157727	24287359	129633	LG07	89248355	89118667	129689	98.81
2	24287346	24303277	15932	LG07	89117919	89101980	15940	99.3
2	24304085	24352207	48123	LG07	89101981	89053744	48238	98.82
2	24352087	24520944	168858	LG07	89053453	88884615	168839	99.09
2	24520813	24614054	93242	LG07	88884616	88791422	93195	99.04
2	24614045	24628371	14327	LG07	88788794	88774470	14325	99.19
2	24628388	24739317	110930	LG07	88774237	88663333	110905	99.04
2	24739317	24833949	94633	LG07	88663214	88568611	94604	98.91
2	24833568	24851887	18320	LG07	88569366	88551015	18352	98.51
2	24852028	25001225	149198	LG07	88551036	88401839	149198	99.17
2	25001313	25021575	20263	LG07	88401845	88381619	20227	98.76
2	25023997	25031195	7199	LG07	88381634	88374436	7199	98.81
2	25031182	25043041	11860	LG07	88374294	88362430	11865	99
2	25043175	25074405	31231	LG07	88362444	88331213	31232	98.85
2	25074323	25119052	44730	LG07	88331395	88286673	44723	98.52
2	25119056	25169142	50087	LG07	88286476	88236551	49926	98.1
2	25169147	25206234	37088	LG07	88233017	88195774	37244	98.24
2	25206234	25223691	17458	LG07	88195680	88178241	17440	97.88
2	25223674	25251615	27942	LG07	88177732	88149784	27949	98.91
2	25251615	25453226	201612	LG07	88149665	87947938	201728	98.75
2	25453655	25515914	62260	LG07	87947950	87885746	62205	98.95
2	25516036	25574245	58210	LG07	87885742	87827509	58234	98.97
2	25574372	25632205	57834	LG07	87827503	87769643	57861	98.9
2	25632147	25671395	39249	LG07	87769643	87730391	39253	99.24
2	25671410	25674991	3582	LG07	87729213	87725628	3586	97.89
2	25674980	25705389	30410	LG07	87724179	87693784	30396	99.06
2	25706268	25729399	23132	LG07	87693798	87670699	23100	99.2
2	25730208	25805640	75433	LG07	87670713	87595197	75517	99
2	25805644	25821960	16317	LG07	87587535	87571246	16290	98.99
2	25821953	25858303	36351	LG07	87569872	87533549	36324	98.75
2	25858413	25943917	85505	LG07	87533549	87447983	85567	98.94
2	25944143	25956893	12751	LG07	87447984	87435198	12787	99
2	25957017	25964152	7136	LG07	87434889	87427746	7144	99.37
2	25964489	26113469	148981	LG07	87426589	87277582	149008	99.04
2	26113076	26243187	130112	LG07	87278117	87148059	130059	98.99
2	26243323	26258781	15459	LG07	87148059	87132597	15463	99.58
2	26258772	26276705	17934	LG07	87132233	87114317	17917	98.86
2	26276776	26289222	12447	LG07	87114406	87101955	12452	99.62
2	26289413	26379392	89980	LG07	87101947	87011995	89953	99.15
2	26379375	26620350	240976	LG07	87009192	86768006	241187	99.04
2	26620358	26688249	67892	LG07	86766744	86698857	67888	99.44
2	26688617	26743097	54481	LG07	86697261	86642760	54502	99.05
2	26742345	26856846	114502	LG07	86642679	86528126	114554	99.2
2	26857431	26886261	28831	LG07	86528111	86499304	28808	99.43
2	26886310	26941490	55181	LG07	86499306	86444141	55166	99.11
2	26941499	27065507	124009	LG07	86443999	86320037	123963	98.92
2	27065509	27133646	68138	LG07	86319910	86251794	68117	99.33
2	27134433	27208255	73823	LG07	86251796	86177943	73854	99.11
2	27209424	27385342	175919	LG07	86177831	86001898	175934	98.67
2	27393602	27505163	111562	LG07	85991937	85880365	111573	99.22
2	27505173	27572893	67721	LG07	85880002	85812242	67761	99.26
2	27572994	27715102	142109	LG07	85812213	85670247	141967	99.43
2	27635135	27636009	875	LG04	41557536	41556662	875	97.16
2	27714992	27864649	149658	LG07	85670254	85520578	149677	99
2	27866133	27869888	3756	LG07	85520590	85516819	3772	98.73
2	27869884	27908278	38395	LG07	85516066	85477562	38505	99.5
2	27908266	27924045	15780	LG07	85477308	85461533	15776	99.56
2	27931817	27941403	9587	LG07	85461549	85451969	9581	99.21
2	27941398	27969668	28271	LG07	85451842	85423514	28329	98.92
2	27969668	28049115	79448	LG07	85423362	85343916	79447	99.34
2	28050428	28113347	62920	LG07	85342568	85279610	62959	99.23
2	28113356	28148621	35266	LG07	85279340	85244084	35257	99.46
2	28148433	28216975	68543	LG07	85244616	85176118	68499	99.08
2	28217146	28265529	48384	LG07	85176117	85127728	48390	99.5
2	28244643	28247197	2555	LG07	85139393	85141946	2554	98.48
2	28251309	28253862	2554	LG07	85146058	85148612	2555	98.4
2	28265529	28519512	253984	LG07	85127598	84873686	253913	99.32
2	28519500	28578518	59019	LG07	84873644	84814663	58982	99.37
2	28578787	28746110	167324	LG07	84814657	84647206	167452	99.04
2	28745971	28927496	181526	LG07	84647116	84465718	181399	99.61
2	28927498	29041417	113920	LG07	84465591	84351644	113948	99.42
2	29041417	29043504	2088	LG07	84351550	84349464	2087	99.23
2	29043522	29055784	12263	LG07	84349346	84337094	12253	99.21
2	29056137	29074190	18054	LG07	84336372	84318301	18072	98.98
2	29074772	29076194	1423	LG07	84317828	84316370	1459	96.78
2	29076188	29153264	77077	LG07	84314716	84237677	77040	98.88
2	29153270	29219709	66440	LG07	84237435	84171007	66429	98.88
2	29219974	29230384	10411	LG07	84171008	84160609	10400	99.36
2	29230724	29379096	148373	LG07	84160623	84012327	148297	99.13
2	29379099	29543789	164691	LG07	84012114	83847402	164713	99.21
2	29549397	29650502	101106	LG07	83843159	83741976	101184	98.84
2	29650489	29911498	261010	LG07	83741482	83480575	260908	99.1
2	29911485	29968389	56905	LG07	83480253	83423373	56881	99.15
2	29968335	29988905	20571	LG07	83423377	83402781	20597	98.89
2	29989119	30022244	33126	LG07	83402780	83369650	33131	99.11
2	30022244	30097952	75709	LG07	83369546	83293771	75776	99.02
2	30097957	30150102	52146	LG07	83293412	83241233	52180	98.94
2	30150534	30158020	7487	LG07	83241246	83233763	7484	99.27
2	30157984	30168931	10948	LG07	83233561	83222627	10935	99.23
2	30168915	30202415	33501	LG07	83220766	83187270	33497	99.26
2	30202416	30276476	74061	LG07	83187170	83113103	74068	99.49
2	30277311	30311259	33949	LG07	83113120	83079151	33970	99.17
2	30311248	30355273	44026	LG07	83072426	83028404	44023	99.71
2	30355824	30470323	114500	LG07	83028419	82914019	114401	99.08
2	30470325	30500635	30311	LG07	82913928	82883653	30276	98.93
2	30500941	30511937	10997	LG07	82883653	82872635	11019	98.08
2	30512247	30599178	86932	LG07	82872635	82785704	86932	99.33
2	30599379	30655643	56265	LG07	82785705	82729394	56312	99.03
2	30655628	30686329	30702	LG07	82728694	82697974	30721	98.98
2	30686048	30768362	82315	LG07	82697968	82615621	82348	99.33
2	30768363	30769260	898	LG07	82615403	82614507	897	98.67
2	30769260	31125713	356454	LG07	82614371	82257855	356517	99.24
2	31125706	31126692	987	LG07	82256825	82255851	975	97.06
2	31126825	31160566	33742	LG07	82256122	82222333	33790	99.55
2	31160580	31242327	81748	LG07	82218257	82136508	81750	99.6
2	31242435	31253439	11005	LG07	82136507	82125524	10984	99.4
2	31253419	31340758	87340	LG07	82125145	82037778	87368	99.26
2	31340643	31926769	586127	LG07	82037749	81451590	586160	99.19
2	31926769	31929358	2590	LG04	121771969	121774558	2590	99.34
2	31927600	31929358	1759	LG07	65894996	65896753	1758	99.49
2	31929368	32063756	134389	LG07	81451606	81317177	134430	98.69
2	32064721	32074448	9728	LG07	81317176	81307433	9744	98.62
2	32074420	32088563	14144	LG07	81307407	81293280	14128	99.3
2	32088565	32093647	5083	LG07	81293184	81288113	5072	98.84
2	32093779	32212133	118355	LG07	81288117	81169844	118274	98.91
2	32212132	32261566	49435	LG07	81169036	81119665	49372	99.11
2	32263629	32294717	31089	LG07	81119639	81088579	31061	98.83
2	32294940	32297069	2130	LG07	81088592	81086464	2129	97.94
2	32296986	32311034	14049	LG07	81086459	81072427	14033	98.83
2	32311035	32368198	57164	LG07	81072274	81014986	57289	98.6
2	32368786	32417090	48305	LG07	81014986	80966696	48291	98.53
2	32417089	32419623	2535	LG07	80966201	80963613	2589	96.29
2	32422443	32487749	65307	LG07	80960531	80895146	65386	99.11
2	32488768	32517794	29027	LG07	80895150	80866115	29036	99.27
2	32518008	32915107	397100	LG07	80866115	80469048	397068	99.11
2	32915102	33202929	287828	LG07	80468359	80180322	288038	99.05
2	33203252	33226064	22813	LG07	80180327	80157439	22889	98.81
2	33226374	33244965	18592	LG07	80157465	80138841	18625	99.01
2	33244931	33449862	204932	LG07	80138779	79933907	204873	99.52
2	33449815	33597879	148065	LG07	79933909	79785830	148080	99.38
2	33596666	33598314	1649	LG07	79790992	79792628	1637	95.28
2	33597870	33604173	6304	LG07	79784178	79777846	6333	98.47
2	33604073	33675691	71619	LG07	79777849	79706220	71630	98.97
2	33675681	33690427	14747	LG07	79703458	79688739	14720	99.08
2	33690415	33874495	184081	LG07	79684965	79500832	184134	99.13
2	33874476	33899792	25317	LG07	79500186	79474873	25314	98.92
2	33899581	33910475	10895	LG07	79475297	79464414	10884	98.89
2	33916387	33918209	1823	LG07	92820280	92822105	1826	99.62
2	33918206	33960630	42425	LG07	79464428	79421996	42433	98.9
2	33960309	34022926	62618	LG07	79420434	79357792	62643	99.15
2	34023243	34026429	3187	LG07	79357791	79354607	3185	99.12
2	34026453	34027270	818	LG07	92916037	92916854	818	99.02
2	34027269	34050286	23018	LG07	79354603	79331551	23053	99.56
2	34050285	34052239	1955	LG07	79330762	79328808	1955	99.85
2	34052908	34108965	56058	LG07	79328806	79272718	56089	99.2
2	34108957	34114307	5351	LG07	79272271	79266909	5363	99.27
2	34114325	34148319	33995	LG07	79266543	79232579	33965	99.46
2	34148453	34151297	2845	LG07	79232579	79229738	2842	99.58
2	34152100	34198832	46733	LG07	79229747	79183096	46652	99.2
2	34199337	34218807	19471	LG07	79183111	79163647	19465	99.11
2	34219043	34286899	67857	LG07	79161686	79093848	67839	98.76
2	34287125	34288143	1019	LG07	79093847	79092832	1016	97.55
2	34288270	34290969	2700	LG07	79092831	79090137	2695	98.44
2	34290881	34325287	34407	LG07	79089945	79055542	34404	99.14
2	34325466	34411046	85581	LG07	79055547	78969952	85596	99.03
2	34414455	34447606	33152	LG07	78969967	78936789	33179	98.65
2	34447608	34468566	20959	LG07	78936695	78915699	20997	98.66
2	34468800	34482925	14126	LG07	78915699	78901569	14131	99.36
2	34482924	34485655	2732	LG07	78900592	78897869	2724	98.28
2	34494081	34503282	9202	LG07	78897370	78888124	9247	97.88
2	34504345	34672573	168229	LG07	78888121	78720026	168096	99.32
2	34672842	34686434	13593	LG07	78720023	78706442	13582	99.26
2	34686545	34695745	9201	LG07	78706440	78697222	9219	99.26
2	34696671	34723967	27297	LG07	78697224	78669915	27310	99.15
2	34723953	34732207	8255	LG07	78668400	78660140	8261	99.35
2	34732213	34745974	13762	LG07	78660016	78646280	13737	98.93
2	34745974	34800751	54778	LG07	78646161	78591408	54754	99.03
2	34801286	34886785	85500	LG07	78591408	78505980	85429	99.01
2	34886818	34916810	29993	LG07	78505826	78475791	30036	99.15
2	34916915	34919335	2421	LG07	78475790	78473332	2459	97.32
2	34921297	35044010	122714	LG07	78473328	78350546	122783	99.1
2	35045835	35047757	1923	LG07	78348858	78346935	1924	97.92
2	35047977	35119249	71273	LG07	78346949	78275650	71300	98.94
2	35119260	35208368	89109	LG07	78275478	78186357	89122	99.18
2	35208382	35253475	45094	LG07	78186218	78141100	45119	99.47
2	35253660	35280976	27317	LG07	78141099	78113824	27276	99.33
2	35280961	35294036	13076	LG07	78111435	78098344	13092	99.27
2	35294031	35295899	1869	LG07	13412926	13411062	1865	97.54
2	35296011	35331350	35340	LG07	78098359	78063043	35317	98.65
2	35331808	35335469	3662	LG07	78063041	78059386	3656	98.09
2	35335951	35395162	59212	LG07	78060523	78001354	59170	99.22
2	35395149	35414945	19797	LG07	78000773	77980971	19803	99.56
2	35414894	35523991	109098	LG07	77980971	77871808	109164	98.93
2	35526012	35633508	107497	LG07	77869839	77762247	107593	98.97
2	35633495	35866236	232742	LG07	77760240	77527562	232679	99.36
2	35866220	36105472	239253	LG07	77527305	77287783	239523	99.16
2	36104770	36109998	5229	LG07	77287708	77282479	5230	99.2
2	36109998	36118454	8457	LG07	77282349	77273900	8450	99.27
2	36124025	36225052	101028	LG07	77275241	77174293	100949	99.15
2	36225699	36250645	24947	LG07	77174308	77149312	24997	98.92
2	36250543	36252058	1516	LG07	77149271	77147748	1524	97.7
2	36250645	36252798	2154	LG07	77149169	77146965	2205	96.47
2	36252801	36334459	81659	LG07	77145704	77064004	81701	99.36
2	36286647	36290747	4101	LG07	91478881	91482981	4101	97.78
2	36286651	36291960	5310	LG04	42775365	42770060	5306	98.17
2	36286659	36292815	6157	LG07	50080547	50074384	6164	98.43
2	36286667	36292815	6149	LG04	66376817	66370672	6146	98.75
2	36334444	36337979	3536	LG07	77063678	77060143	3536	99.94
2	36338143	36362253	24111	LG07	77060132	77036019	24114	99.4
2	36362251	36363817	1567	LG04	42775368	42773803	1566	99.43
2	36363995	36364657	663	LG07	77036034	77035372	663	99.7
2	36364648	36370695	6048	LG07	77031555	77025461	6095	98.41
2	36371347	36426231	54885	LG07	77025466	76970583	54884	98.94
2	36426236	36496215	69980	LG07	76970486	76900475	70012	99.06
2	36496689	36658216	161528	LG07	76900488	76738911	161578	98.86
2	36658332	36680919	22588	LG07	76738911	76716326	22586	98.57
2	36681085	36734126	53042	LG07	76716324	76663333	52992	99.13
2	36734120	37377950	643831	LG07	76662520	76018619	643902	99.57
2	37377947	37379795	1849	LG04	42748958	42747111	1848	99.08
2	37377992	37379795	1804	LG07	4792151	4790350	1802	99.17
2	37379795	37550379	170585	LG07	76018634	75848083	170552	99.58
2	37550191	37888491	338301	LG07	75848082	75509676	338407	99.55
2	37888581	37902094	13514	LG07	75509676	75496156	13521	99.62
2	37902091	37961157	59067	LG07	75496106	75437029	59078	99.67
2	37961751	38073335	111585	LG07	75437537	75325920	111618	99.78
2	38073384	38191056	117673	LG07	75325933	75208349	117585	99.7
2	38191006	38218761	27756	LG07	75208299	75180501	27799	98.98
2	38219073	38321704	102632	LG07	75180171	75077572	102600	98.95
2	38321818	38365191	43374	LG07	75077570	75034152	43419	99.39
2	38365177	38452010	86834	LG07	75033554	74946745	86810	99.15
2	38453258	38504924	51667	LG07	74946759	74895081	51679	99.2
2	38504989	38522301	17313	LG07	74895119	74877797	17323	99.24
2	38523186	38595155	71970	LG07	74877761	74805811	71951	98.95
2	38598673	38614346	15674	LG07	74805811	74790130	15682	99.08
2	38614256	38625246	10991	LG07	74790175	74779184	10992	99.33
2	38626301	38669031	42731	LG07	74778847	74736163	42685	99.21
2	38669016	39242089	573074	LG07	74734807	74161789	573019	99.17
2	39242655	39858707	616053	LG07	74161787	73545652	616136	99.35
2	39858691	39874917	16227	LG07	73543991	73527772	16220	99.13
2	39874915	39876685	1771	LG07	13411119	13412893	1775	98.08
2	39876704	39913632	36929	LG07	73527776	73490846	36931	99.03
2	39914301	40061990	147690	LG07	73491517	73343745	147773	99.19
2	40061978	40109812	47835	LG07	73343542	73295734	47809	99.09
2	40110747	40141060	30314	LG07	73294983	73264709	30275	99.3
2	40141234	40189243	48010	LG07	73264699	73216732	47968	99.53
2	40189231	40212369	23139	LG07	73216371	73193170	23202	99.46
2	40212555	40218481	5927	LG07	73193168	73187239	5930	99.46
2	40218609	40321006	102398	LG07	73187232	73084680	102553	98.92
2	40320989	40370989	50001	LG07	73084659	73034623	50037	98.88
2	40370989	40384332	13344	LG07	73034535	73021184	13352	99.33
2	40384332	40474600	90269	LG07	73021038	72930688	90351	98.78
2	40477626	40503182	25557	LG07	72929712	72904147	25566	99.09
2	40503330	40528530	25201	LG07	72904143	72878955	25189	99
2	40528703	40533473	4771	LG07	72878955	72874184	4772	98.77
2	40534541	40567438	32898	LG07	72874201	72841246	32956	98.92
2	40567426	40582826	15401	LG07	72839806	72824413	15394	98.98
2	40582816	40671426	88611	LG07	72823699	72734898	88802	99.22
2	40671532	40750701	79170	LG07	72734896	72655716	79181	99.3
2	40750704	40825205	74502	LG07	72655570	72581018	74553	98.94
2	40825209	40846005	20797	LG07	72580766	72560022	20745	98.71
2	40846017	40975734	129718	LG07	72559907	72430115	129793	98.96
2	40975938	41004101	28164	LG07	72430130	72401882	28249	98.94
2	41004226	41064361	60136	LG07	72401883	72341737	60147	99.18
2	41064359	41067387	3029	LG07	72341625	72338592	3034	98.35
2	41067383	41074458	7076	LG07	72336637	72329548	7090	98.13
2	41075657	41100679	25023	LG07	72329556	72304551	25006	98.62
2	41100587	41131748	31162	LG07	72304550	72273360	31191	98.59
2	41131848	41159811	27964	LG07	72273360	72245437	27924	99.07
2	41159798	41173511	13714	LG07	72244219	72230503	13717	99.05
2	41173498	41236426	62929	LG07	72230162	72167179	62984	99.22
2	41236968	41244232	7265	LG07	72167177	72159981	7197	97.53
2	41244322	41276859	32538	LG07	72159981	72127410	32572	98.71
2	41276870	41352644	75775	LG07	72127192	72051432	75761	98.65
2	41353006	41356689	3684	LG07	72051433	72047747	3687	98.94
2	41356690	41430444	73755	LG07	72047227	71973438	73790	99.01
2	41430944	41431469	526	LG07	71973439	71972914	526	99.43
2	41433424	41462738	29315	LG07	71972909	71943595	29315	98.71
2	41462738	41487234	24497	LG07	71943443	71918895	24549	98.82
2	41487427	41525279	37853	LG07	71918898	71881053	37846	98.97
2	41525028	41550893	25866	LG07	71881170	71855306	25865	98.91
2	41552049	41564245	12197	LG07	71855313	71843112	12202	99.16
2	41565191	41606582	41392	LG07	71843124	71801738	41387	99.27
2	41606573	41645382	38810	LG07	71800119	71761363	38757	98.75
2	41645530	41769619	124090	LG07	71761356	71637345	124012	98.87
2	41770239	41869546	99308	LG07	71637346	71538029	99318	99.28
2	41859579	41882260	22682	LG07	71548002	71525364	22639	98.77
2	41882289	42108210	225922	LG07	71525376	71299329	226048	99.27
2	42108497	42213786	105290	LG07	71299381	71194057	105325	99.02
2	42213771	42237039	23269	LG07	71193930	71170643	23288	99.28
2	42237047	42249472	12426	LG07	71170515	71158116	12400	99.1
2	42249471	42275440	25970	LG07	71158242	71132247	25996	99.49
2	42275444	42424570	149127	LG07	71131855	70982654	149202	99.27
2	42424622	42684499	259878	LG07	70981892	70722148	259745	98.96
2	42640035	42660557	20523	LG07	70687812	70667302	20511	98.27
2	42652409	42670809	18401	LG07	70614532	70596134	18399	96.91
2	42674451	42690434	15984	LG07	70533787	70517814	15974	97.89
2	42688389	42773256	84868	LG07	70722146	70637194	84953	98.75
2	42717679	42732139	14461	LG07	70771543	70757075	14469	97.51
2	42720012	42736252	16241	LG07	70570858	70554604	16255	98.51
2	42775839	43034804	258966	LG07	70579825	70320930	258896	99.09
2	42775839	42782659	6821	LG07	70637197	70630366	6832	97.66
2	42784531	42799294	14764	LG07	70629873	70615095	14779	96.87
2	42791570	42812084	20515	LG07	70683734	70663221	20514	98.8
2	42802759	42818480	15722	LG07	70611622	70595912	15711	96.92
2	42818838	42831961	13124	LG07	70735195	70722148	13048	96.84
2	42835831	42846626	10796	LG07	70722146	70711391	10756	95.08
2	43034796	43382202	347407	LG07	70319764	69972394	347371	99.4
2	43382373	43517006	134634	LG07	69972392	69837733	134660	99.39
2	43517566	43594188	76623	LG07	69837744	69761103	76642	99.47
2	43594338	43663953	69616	LG07	69761103	69691486	69618	99.49
2	43664066	43870547	206482	LG07	69691486	69484796	206691	99.27
2	43871218	44015109	143892	LG07	69484816	69341019	143798	99.21
2	44015478	44046875	31398	LG07	69341035	69309626	31410	98.44
2	44048038	44184903	136866	LG07	69309636	69172968	136669	99.1
2	44184832	44197793	12962	LG07	69172971	69160000	12972	98.94
2	44197577	44240043	42467	LG07	69159856	69117416	42441	99.09
2	44239798	44266747	26950	LG07	69117264	69090281	26984	98.93
2	44266730	44295060	28331	LG07	69082518	69054132	28387	98.79
2	44295113	44331623	36511	LG07	69054401	69017881	36521	98.97
2	44331609	44481277	149669	LG07	69016687	68867154	149534	99.02
2	44481390	44492165	10776	LG07	68867136	68856361	10776	99.38
2	44492280	44516695	24416	LG07	68856361	68831876	24486	98.56
2	44516681	44520507	3827	LG07	68830707	68826882	3826	99.14
2	44520412	44565633	45222	LG07	68826932	68781670	45263	98.79
2	44565649	44573754	8106	LG07	68781039	68772924	8116	99.25
2	44574775	44617147	42373	LG07	68767306	68724952	42355	98.82
2	44618876	44707197	88322	LG07	68724958	68636648	88311	99.16
2	44707664	44771406	63743	LG07	68635527	68571753	63775	98.55
2	44771408	44776148	4741	LG07	68570115	68565380	4736	98.48
2	44776577	44894281	117705	LG07	68565052	68447361	117692	98.89
2	44894259	45134480	240222	LG07	68439624	68199430	240195	98.94
2	45134498	45236940	102443	LG07	68199256	68096801	102456	98.64
2	45237789	45309236	71448	LG07	68095804	68024276	71529	98.9
2	45310204	45373850	63647	LG07	68024294	67960695	63600	99.06
2	45376470	45479212	102743	LG07	67960708	67857956	102753	99.23
2	45479212	45508890	29679	LG07	67857823	67828190	29634	98.93
2	45509216	45520340	11125	LG07	67828239	67817121	11119	99.47
2	45520340	45527301	6962	LG07	67816716	67809757	6960	98.78
2	45527180	45566539	39360	LG07	67809753	67770375	39379	99.36
2	45566632	45743002	176371	LG07	67770371	67593975	176397	99.16
2	45744613	45755895	11283	LG07	67593974	67582693	11282	99.14
2	45755808	45786658	30851	LG07	67582650	67551832	30819	99.08
2	45786797	45840057	53261	LG07	67551832	67498455	53378	98.58
2	45840203	45865172	24970	LG07	67498455	67473497	24959	98.36
2	45865173	45959787	94615	LG07	67473343	67378861	94483	98.25
2	45960398	46202787	242390	LG07	67378874	67136604	242271	99.18
2	46203144	46290057	86914	LG07	67136052	67049022	87031	98.93
2	46290042	46315441	25400	LG07	67048852	67023477	25376	98.37
2	46315683	46325086	9404	LG07	67023489	67014052	9438	98.02
2	46325612	46335718	10107	LG07	67014052	67003951	10102	99.5
2	46335883	46415160	79278	LG07	67003951	66924683	79269	98.96
2	46415149	46424107	8959	LG07	66916942	66907999	8944	98.85
2	46424108	46434169	10062	LG07	66907122	66897098	10025	98.59
2	46434155	46463823	29669	LG07	66896013	66866367	29647	98.8
2	46464176	46521794	57619	LG07	66866381	66808809	57573	98.85
2	46521796	46524006	2211	LG07	66808664	66806445	2220	97.18
2	46523991	46563502	39512	LG07	66802978	66763489	39490	98.31
2	46564151	46622343	58193	LG07	66763504	66705314	58191	98.38
2	46622345	46631419	9075	LG07	66705152	66696084	9069	98.78
2	46631430	46640171	8742	LG07	66696190	66687440	8751	98.39
2	46640170	46677985	37816	LG07	66686215	66648406	37810	98.77
2	46677999	46705862	27864	LG07	66648282	66620378	27905	98.45
2	46705851	46798707	92857	LG07	66618575	66525711	92865	99
2	46799579	46837509	37931	LG07	66525694	66487674	38021	98.85
2	46838628	46844239	5612	LG07	66484671	66479055	5617	98.58
2	46844226	46882802	38577	LG07	66476884	66438434	38451	97.64
2	46882829	46903084	20256	LG07	66438551	66418300	20252	98.59
2	46905380	46926206	20827	LG07	66418301	66397475	20827	98.36
2	46926193	46940357	14165	LG07	66396159	66382005	14155	99.09
2	46941405	47009663	68259	LG07	66381981	66313821	68161	98.92
2	47010012	47024047	14036	LG07	66313836	66299796	14041	99.57
2	47024035	47098120	74086	LG07	66298539	66224447	74093	99.18
2	47098107	47107181	9075	LG07	66223491	66214473	9019	97.89
2	47107273	47145539	38267	LG07	66214473	66176169	38305	98.73
2	47145520	47164935	19416	LG07	66168437	66149023	19415	99.09
2	47165700	47189879	24180	LG07	66149034	66124871	24164	98.73
2	47189869	47319917	130049	LG07	66124341	65994334	130008	98.79
2	47319907	47354870	34964	LG07	65994195	65959238	34958	99.39
2	47354855	47414969	60115	LG07	65957012	65896801	60212	98.63
2	47414956	47494676	79721	LG07	65894992	65815234	79759	99.09
2	47451843	47456301	4459	LG07	65735586	65740056	4471	95.65
2	47478701	47483162	4462	LG07	65533532	65538007	4476	95.01
2	47483440	47487632	4193	LG07	65538009	65542178	4170	95.71
2	47494676	47623600	128925	LG07	65815109	65686127	128983	99.02
2	47507319	47510828	3510	LG07	65579440	65582930	3491	94.37
2	47517730	47521434	3705	LG07	65599712	65603398	3687	95.13
2	47529298	47532805	3508	LG07	65682208	65685711	3504	96.55
2	47533494	47549462	15969	LG07	65687830	65703796	15967	97.48
2	47550098	47557890	7793	LG07	65707635	65715427	7793	96.94
2	47569667	47574137	4471	LG07	65853635	65858107	4473	96.22
2	47594305	47602097	7793	LG07	65751833	65759625	7793	96.98
2	47605935	47621922	15988	LG07	65760261	65776220	15960	97.39
2	47623601	47627524	3924	LG07	65776451	65780419	3969	96.7
2	47624061	47638168	14108	LG07	65685711	65671526	14186	97.78
2	47638730	47692019	53290	LG07	65671541	65618245	53297	98.74
2	47692380	47700284	7905	LG07	65618246	65610319	7928	98.89
2	47700413	47731314	30902	LG07	65610333	65579440	30894	98.6
2	47731341	47735335	3995	LG07	65579557	65575567	3991	98.9
2	47735322	47951649	216328	LG07	65575502	65359257	216246	99.34
2	47764488	47768066	3579	LG07	65818172	65821752	3581	97.05
2	47768626	47772798	4173	LG07	65822283	65826479	4197	95.97
2	47772800	47777283	4484	LG07	65826757	65831224	4468	95.22
2	47951645	48251787	300143	LG07	65358856	65058920	299937	99.35
2	48251773	48253735	1963	LG07	65057503	65055541	1963	99.64
2	48253736	48339478	85743	LG07	65055319	64969672	85648	99.38
2	48260054	48262157	2104	LG07	65043336	65045440	2105	98.72
2	48263621	48265724	2104	LG07	65046900	65049004	2105	98.62
2	48339478	48395777	56300	LG07	64969561	64913188	56374	99.13
2	48395772	48500692	104921	LG07	64911896	64806953	104944	99.3
2	48500692	48529370	28679	LG07	64806793	64778130	28664	99.35
2	48529370	48584754	55385	LG07	64777858	64722486	55373	99.36
2	48585116	48641233	56118	LG07	64722494	64666326	56169	99.33
2	48641231	48687209	45979	LG07	64666059	64620085	45975	99.06
2	48686596	48848050	161455	LG07	64620006	64458601	161406	98.82
2	48848346	49073298	224953	LG07	64458602	64233391	225212	99.37
2	49073927	49120158	46232	LG07	64232748	64186529	46220	99.12
2	49120287	49149156	28870	LG07	64186527	64157627	28901	98.98
2	49149336	49222421	73086	LG07	64157628	64084560	73069	99.52
2	49222423	49244349	21927	LG07	64084414	64062486	21929	99.31
2	49244097	49349378	105282	LG07	64062603	63957358	105246	99.1
2	49349373	49725762	376390	LG07	63956583	63580224	376360	99.32
2	49374512	49376496	1985	LG07	63941421	63943411	1991	94.78
2	49725903	49761695	35793	LG07	63580224	63544452	35773	99.03
2	49761787	49890568	128782	LG07	63544575	63415873	128703	99.24
2	49890554	50037202	146649	LG07	63415201	63268555	146647	99.23
2	50037204	50053774	16571	LG07	63268465	63251884	16582	99.69
2	50053880	50112325	58446	LG07	63251884	63193418	58467	99.16
2	50112428	50121552	9125	LG07	63193418	63184296	9123	98.98
2	50124120	50129742	5623	LG07	63184311	63178688	5624	99.57
2	50129885	50143610	13726	LG07	63178688	63164965	13724	99.37
2	50143363	50273801	130439	LG07	63165112	63034687	130426	99.34
2	50273839	50304337	30499	LG07	63034689	63004290	30400	98.82
2	50304678	50582017	277340	LG07	63004125	62726724	277402	99.19
2	50582145	50661467	79323	LG07	62726722	62647384	79339	99
2	50662155	50677462	15308	LG07	62647384	62632070	15315	99.61
2	50677575	50681063	3489	LG07	62632057	62628569	3489	98.8
2	50681099	50704039	22941	LG07	62628676	62605683	22994	98.66
2	50703115	50869350	166236	LG07	62606847	62440503	166345	99.17
2	50869338	51173236	303899	LG07	62439323	62135648	303676	99.4
2	51173221	51178008	4788	LG07	62135427	62130639	4789	99.46
2	51178009	51246509	68501	LG07	62130710	62062180	68531	99.24
2	51246509	51407945	161437	LG07	62061685	61900264	161422	99.33
2	51261363	51262631	1269	LG07	62036671	62037932	1262	96.06
2	51407946	51571792	163847	LG07	61900049	61736269	163781	99.35
2	51571496	51635888	64393	LG07	61736266	61671873	64394	99.61
2	51635887	51990362	354476	LG07	61671538	61317056	354483	99.44
2	51990440	52116987	126548	LG07	61317095	61190533	126563	99.15
2	52116788	52213562	96775	LG07	61190531	61093728	96804	99.48
2	52213563	52671847	458285	LG07	61093788	60635712	458077	99.12
2	52671833	52767382	95550	LG07	60635519	60540101	95419	98.91
2	52767695	52822910	55216	LG07	60539623	60484414	55210	99.1
2	52819296	52860977	41682	LG07	60480771	60439128	41644	98.99
2	52860977	52965354	104378	LG07	60439023	60334681	104343	99.55
2	52965637	52968943	3307	LG07	60334680	60331375	3306	99.06
2	52968929	53026476	57548	LG07	60331131	60273627	57505	99.56
2	53026225	53045464	19240	LG07	60274185	60254947	19239	99.59
2	53045447	53069869	24423	LG07	60254762	60230353	24410	99.41
2	53070399	53421436	351038	LG07	60230368	59879351	351018	99.47
2	53421529	53541727	120199	LG07	59879351	59759207	120145	99.19
2	53541711	53800308	258598	LG07	59758502	59499960	258543	99.56
2	53700676	53705178	4503	LG07	59481241	59476724	4518	96.12
2	53760276	53769494	9219	LG07	59425975	59416795	9181	97.31
2	53800303	53851886	51584	LG07	59499022	59447431	51592	99.53
2	53822018	53834967	12950	LG07	59591837	59578872	12966	96.72
2	53839012	53849589	10578	LG07	59578115	59567555	10561	97.05
2	53849589	53869857	20269	LG07	59566974	59546720	20255	97.04
2	53851887	53920374	68488	LG07	59445687	59377200	68488	99.1
2	53928118	54025126	97009	LG07	59377214	59280151	97064	99.19
2	54027913	54135068	107156	LG07	59279040	59171886	107155	99.21
2	54135897	54164197	28301	LG07	59171884	59143602	28283	99.15
2	54164186	54167098	2913	LG07	59143040	59140125	2916	99.01
2	54167087	54174110	7024	LG07	59139781	59132759	7023	99.05
2	54174549	54183100	8552	LG07	59131704	59123167	8538	98.95
2	54183096	54210248	27153	LG07	59122106	59094950	27157	98.21
2	54210379	54221951	11573	LG07	59094949	59083377	11573	99.14
2	54221938	54256177	34240	LG07	59081571	59047298	34274	99.11
2	54256310	54257103	794	LG07	59047291	59046510	782	97.98
2	54259391	54350807	91417	LG07	59046523	58955187	91337	98.98
2	54351083	54355986	4904	LG07	58955199	58950299	4901	99.06
2	54356813	54360944	4132	LG07	58950297	58946153	4145	98.91
2	54362226	54485496	123271	LG07	58946155	58822828	123328	99
2	54487346	54499034	11689	LG07	58822839	58811145	11695	99.38
2	54499034	54508116	9083	LG07	58810419	58801349	9071	99.28
2	54508102	54513929	5828	LG07	58800866	58795038	5829	99.76
2	54515429	54525241	9813	LG07	58795050	58785241	9810	99.41
2	54525251	54532335	7085	LG07	58781170	58774105	7066	98.53
2	54533856	54535149	1294	LG07	58774118	58772826	1293	97.92
2	54535137	54559410	24274	LG07	58770458	58746188	24271	99.14
2	54559438	54690656	131219	LG07	58744572	58613333	131240	99.02
2	54690645	54748111	57467	LG07	58612966	58555505	57462	99.17
2	54748368	54799232	50865	LG07	58555503	58504680	50824	99.38
2	54799214	54862288	63075	LG07	58503927	58440846	63082	99.19
2	54862906	54891833	28928	LG07	58440860	58411943	28918	98.89
2	54891563	54915441	23879	LG07	58412025	58388168	23858	98.83
2	54913695	54915878	2184	LG07	58390509	58392695	2187	92.7
2	54915443	54941093	25651	LG07	58387998	58362330	25669	98.8
2	54941192	54983681	42490	LG07	58362324	58319857	42468	98.72
2	54983794	55007319	23526	LG07	58319856	58296339	23518	98.53
2	55007305	55034542	27238	LG07	58296117	58268868	27250	99.21
2	55034526	55080562	46037	LG07	58267474	58221349	46126	99
2	55080901	55132551	51651	LG07	58221362	58169712	51651	99.25
2	55132551	55174207	41657	LG07	58169588	58127956	41633	99.24
2	55141018	55152756	11739	LG07	58073767	58062091	11677	96.96
2	55174206	55252223	78018	LG07	58119948	58041988	77961	99.28
2	55220467	55232147	11681	LG07	58161137	58149408	11730	96.66
2	55232147	55244299	12153	LG07	58149192	58137034	12159	96.98
2	55252208	55325608	73401	LG07	58038953	57965582	73372	99.29
2	55325664	55397201	71538	LG07	57965667	57894107	71561	99
2	55396577	55524818	128242	LG07	57893836	57765636	128201	99.35
2	55524978	55647396	122419	LG07	57765634	57643266	122369	99.34
2	55647383	55726407	79025	LG07	57641220	57562217	79004	99.18
2	55726396	55760286	33891	LG07	57557747	57523846	33902	99.21
2	55760289	55810623	50335	LG07	57522247	57471884	50364	98.92
2	55812266	55888815	76550	LG07	57471897	57395508	76390	98.44
2	55889719	55894288	4570	LG07	57395520	57390947	4574	99.02
2	55896773	55934712	37940	LG07	57390962	57352990	37973	99.53
2	55941875	56003483	61609	LG07	57346020	57284495	61526	98.78
2	56003224	56042734	39511	LG07	57284610	57245074	39537	98.85
2	56042735	56050480	7746	LG04	13247597	13255335	7739	99.05
2	56044791	56050454	5664	LG04	35113698	35119363	5666	99.22
2	56050916	56058859	7944	LG07	57244849	57236899	7951	98.05
2	56058860	56060240	1381	LG07	57234226	57232848	1379	98.91
2	56062724	56076018	13295	LG07	57232860	57219576	13285	98.7
2	56076873	56142566	65694	LG07	57219556	57153907	65650	98.76
2	56143893	56166773	22881	LG07	57153922	57131009	22914	98.36
2	56166264	56197231	30968	LG07	57130712	57099759	30954	98.72
2	56199461	56225688	26228	LG07	57099784	57073535	26250	98.63
2	56225683	56267931	42249	LG07	57072262	57030115	42148	98.9
2	56268439	56293042	24604	LG07	57028059	57003446	24614	98.84
2	56293026	56324202	31177	LG07	57002656	56971480	31177	99.18
2	56326586	56366084	39499	LG07	56971497	56932001	39497	99.27
2	56372004	56421951	49948	LG07	56932018	56882124	49895	98.5
2	56421951	56472873	50923	LG07	56882023	56831188	50836	98.73
2	56473045	56474259	1215	LG07	56831175	56829972	1204	97.54
2	56474257	56491498	17242	LG07	56829294	56812048	17247	99.63
2	56494275	56512095	17821	LG07	56812053	56794195	17859	99.23
2	56512030	56514175	2146	LG07	56794079	56791941	2139	98.37
2	56514173	56551983	37811	LG07	56791075	56753297	37779	99.1
2	56551805	56590822	39018	LG07	56753386	56714399	38988	98.52
2	56590923	56624543	33621	LG07	56714260	56680675	33586	99.11
2	56625077	56641877	16801	LG07	56680260	56663464	16797	98.65
2	56642984	56655659	12676	LG07	56663464	56650789	12676	98.94
2	56655301	56884944	229644	LG07	56648898	56419222	229677	98.94
2	56884959	56907684	22726	LG07	56419116	56396409	22708	98.62
2	56909173	57092399	183227	LG07	56393362	56210136	183227	99.14
2	57092515	57240215	147701	LG07	56210136	56062407	147730	99.3
2	57185730	57187537	1808	LG07	56111128	56112926	1799	91.57
2	57240312	57278703	38392	LG07	56062407	56024039	38369	99.04
2	57279618	57351673	72056	LG07	56024050	55951987	72064	99.17
2	57351679	57378200	26522	LG07	55951742	55925208	26535	98.58
2	57377745	57492697	114953	LG07	55926568	55811595	114974	99.45
2	57492698	57689622	196925	LG07	55811641	55614969	196673	99.11
2	57690671	57700130	9460	LG07	55614961	55605473	9489	98.02
2	57700301	57717092	16792	LG07	55605471	55588694	16778	98.93
2	57717294	57722924	5631	LG07	55588708	55583077	5632	99.63
2	57722919	57908824	185906	LG07	55582930	55396981	185950	99.12
2	57908853	57916582	7730	LG07	28581936	28589652	7717	98.13
2	57908932	57916582	7651	LG04	65039070	65046725	7656	98.1
2	57910373	57912398	2026	LG04	11549672	11551697	2026	99.56
2	57916584	57945736	29153	LG07	55396996	55367902	29095	98.06
2	57946979	57954853	7875	LG07	55367915	55360060	7856	98.6
2	57954844	57987853	33010	LG07	55359589	55326591	32999	99.31
2	57987942	58008448	20507	LG07	55326591	55306020	20572	98.85
2	58008450	58025106	16657	LG07	55305380	55288649	16732	98.42
2	58025096	58037884	12789	LG07	55288446	55275625	12822	98.83
2	58038002	58102871	64870	LG07	55275628	55210716	64913	98.88
2	58099821	58109250	9430	LG07	55204331	55213793	9463	98.68
2	58106173	58169784	63612	LG07	55207409	55143816	63594	98.77
2	58170253	58171104	852	LG07	77034104	77034955	852	99.88
2	58171104	58188679	17576	LG07	55143830	55126232	17599	98.9
2	58188676	58192215	3540	LG04	64136437	64139969	3533	98.28
2	58188687	58192215	3529	LG07	83072417	83075957	3541	98.48
2	58192215	58271405	79191	LG07	55126245	55047128	79118	98.73
2	58271722	58372132	100411	LG07	55047139	54946756	100384	99.02
2	58372117	58376458	4342	LG07	54946390	54942062	4329	98.67
2	58378765	58423694	44930	LG07	54942063	54897128	44936	99.08
2	58423775	58436953	13179	LG07	54897129	54883931	13199	99.52
2	58437187	58438341	1155	LG07	54883932	54882780	1153	99.22
2	58438727	58498536	59810	LG07	54882780	54822939	59842	99.13
2	58499085	58509742	10658	LG07	54822952	54812271	10682	98.37
2	58509882	58514195	4314	LG07	54812269	54807945	4325	98.15
2	58514437	58611691	97255	LG07	54807950	54710751	97200	99.12
2	58611836	58674002	62167	LG07	54710751	54648591	62161	99.2
2	58673990	58716991	43002	LG07	54648416	54605465	42952	98.94
2	58717165	58728915	11751	LG07	54605465	54593718	11748	99.24
2	58728900	58767885	38986	LG07	54592968	54553966	39003	98.89
2	58767829	58797651	29823	LG07	54554097	54524298	29800	98.81
2	58797902	58835489	37588	LG07	54524205	54486645	37561	98.99
2	58835993	58840880	4888	LG07	54486658	54481754	4905	99.06
2	58841300	58907089	65790	LG07	54481764	54415964	65801	99.07
2	58907089	58911854	4766	LG07	54415822	54411064	4759	98.34
2	58911869	59006223	94355	LG07	54410053	54315576	94478	98.98
2	59006241	59011927	5687	LG07	54313826	54308142	5685	99.49
2	59012045	59024229	12185	LG07	54308136	54295953	12184	99.38
2	59024235	59031953	7719	LG07	32106166	32113892	7727	98.68
2	59031967	59339988	308022	LG07	54295960	53987947	308014	99.15
2	59340101	59403633	63533	LG07	53987828	53924312	63517	99.27
2	59403633	59416360	12728	LG07	53924158	53911467	12692	98.18
2	59416361	59416885	525	LG07	69089691	69090215	525	100
2	59416877	59431936	15060	LG07	53911484	53896439	15046	99.25
2	59432044	59444024	11981	LG07	53896456	53884566	11891	98.32
2	59444027	59470123	26097	LG07	53884399	53858276	26124	98.3
2	59470260	59486840	16581	LG07	53858276	53841680	16597	98.52
2	59486826	59637092	150267	LG07	53841578	53691251	150328	98.94
2	59637081	59668717	31637	LG07	53690779	53659137	31643	99.61
2	59668722	59675261	6540	LG07	53658541	53652005	6537	99.1
2	59675261	59714860	39600	LG07	53649556	53609917	39640	99.09
2	59714871	59717870	3000	LG07	53609756	53606747	3010	98.44
2	59718944	59765647	46704	LG07	53606761	53560070	46692	98.97
2	59765640	59800031	34392	LG07	53558754	53524354	34401	99.58
2	59800016	60060663	260648	LG07	53522123	53261539	260585	99.34
2	60060744	60086766	26023	LG07	53261244	53235217	26028	99.22
2	60086754	60165761	79008	LG07	53234250	53155283	78968	98.59
2	60165905	60189506	23602	LG07	53155283	53131716	23568	98.73
2	60189941	60211816	21876	LG07	53131716	53109896	21821	98.64
2	60211813	60224734	12922	LG07	53108796	53095870	12927	98.86
2	60225498	60422342	196845	LG07	53095880	52898934	196947	98.9
2	60422634	60509892	87259	LG07	52898949	52811713	87237	98.87
2	60510148	60596283	86136	LG07	52811723	52725616	86108	99.04
2	60596795	60643330	46536	LG07	52725618	52679103	46516	99.06
2	60643274	60971420	328147	LG07	52679010	52350718	328293	99.04
2	60971405	60975455	4051	LG07	52350477	52346421	4057	99.65
2	60975369	61042469	67101	LG07	52346466	52279386	67081	99.21
2	61043352	61044605	1254	LG04	43699647	43700899	1253	99.12
2	61043784	61044606	823	LG04	14894698	14893874	825	99.39
2	61043945	61044605	661	LG07	35422139	35421481	659	99.09
2	61044603	61080495	35893	LG07	52279398	52243527	35872	99.14
2	61080494	61085915	5422	LG07	52243490	52238055	5436	98.88
2	61086098	61142622	56525	LG07	52238055	52181464	56592	98.94
2	61143089	61144215	1127	LG04	27836686	27837810	1125	98.23
2	61144206	61176134	31929	LG07	52181474	52149574	31901	99.15
2	61158774	61160345	1572	LG04	2486613	2485040	1574	98.92
2	61159575	61160345	771	LG04	38534312	38535082	771	99.48
2	61176134	61244051	67918	LG07	52149343	52081477	67867	98.56
2	61244691	61269274	24584	LG07	52081477	52056881	24597	97.41
2	61275318	61313563	38246	LG07	52049197	52010949	38249	98.5
2	61313771	61381766	67996	LG07	52010967	51942933	68035	99.05
2	61337963	61338790	828	LG04	42899785	42898953	833	98.68
2	61381914	61469050	87137	LG07	51941686	51854524	87163	99.29
2	61469959	61572955	102997	LG07	51854537	51751538	103000	99.02
2	61572963	61584609	11647	LG07	51751021	51739375	11647	98.92
2	61584479	61637651	53173	LG07	51738922	51685687	53236	98.85
2	61642166	61724026	81861	LG07	51680428	51598552	81877	98.8
2	61723993	61779835	55843	LG07	51597499	51541660	55840	99.29
2	61779854	61781445	1592	LG07	51541430	51539839	1592	99.31
2	61781431	61799809	18379	LG07	51532704	51514331	18374	99.5
2	61799809	61814102	14294	LG07	51514074	51499771	14304	98.83
2	61814104	61917565	103462	LG07	51499426	51395858	103569	99.12
2	61917551	61974233	56683	LG07	51394740	51338086	56655	99.03
2	61974369	62013600	39232	LG07	51338075	51298859	39217	98.98
2	62013687	62254929	241243	LG07	51298861	51057480	241382	99.12
2	62255024	62371194	116171	LG07	51057478	50941277	116202	99.05
2	62371177	62391458	20282	LG07	50941045	50920717	20329	98.58
2	62390533	62424731	34199	LG07	50925257	50891042	34216	99.13
2	62424734	62426627	1894	LG07	50890398	50888526	1873	98.31
2	62426719	62793286	366568	LG07	50888525	50522101	366425	99.21
2	62793287	62804582	11296	LG07	50521948	50510647	11302	99.11
2	62804582	62853404	48823	LG07	50510531	50461732	48800	98.84
2	62857029	62871561	14533	LG07	50461745	50447210	14536	99.4
2	62871562	62882718	11157	LG07	50447023	50435858	11166	98.89
2	62882743	62961365	78623	LG07	50435187	50356530	78658	99.17
2	62961683	63007235	45553	LG07	50356526	50310975	45552	98.92
2	63007523	63036237	28715	LG07	50310971	50282235	28737	98.54
2	63036512	63086535	50024	LG07	50282248	50232211	50038	98.43
2	63086661	63158407	71747	LG07	50232211	50160404	71808	98.62
2	63158540	63172576	14037	LG07	50160397	50146377	14021	99.49
2	63172772	63238622	65851	LG07	50146377	50080570	65808	98.64
2	63238601	63240702	2102	LG07	50072797	50070691	2107	97.11
2	63254456	63273989	19534	LG07	50064061	50044531	19531	98.61
2	63273989	63300880	26892	LG07	50044447	50017562	26886	98.04
2	63300880	63361359	60480	LG07	50017442	49956979	60464	99.04
2	63361881	63509917	148037	LG07	49956981	49808932	148050	98.94
2	63509906	63522437	12532	LG07	49805590	49793073	12518	98.38
2	63522434	63530165	7732	LG07	28581941	28589661	7721	98.73
2	63530168	63537889	7722	LG07	49793085	49785366	7720	98.29
2	63537328	63645918	108591	LG07	49783773	49675127	108647	98.76
2	63646070	63801143	155074	LG07	49675142	49520065	155078	98.68
2	63801129	63811737	10609	LG07	49518852	49508231	10622	99.51
2	63811970	63938043	126074	LG07	49508227	49382053	126175	98.76
2	63938309	63941228	2920	LG07	21504561	21501643	2919	99.21
2	63938324	63940419	2096	LG04	22755707	22753613	2095	98.47
2	63942068	63957924	15857	LG07	49382064	49366155	15910	98.53
2	63957924	64069587	111664	LG07	49365796	49254264	111533	99.14
2	64070901	64072247	1347	LG07	49243672	49242327	1346	99.03
2	64072360	64092509	20150	LG07	49242327	49222187	20141	98.65
2	64092766	64127597	34832	LG07	49222187	49187347	34841	99.07
2	64127597	64239462	111866	LG07	49187240	49075425	111816	99.3
2	64239584	64507764	268181	LG07	49075446	48807391	268056	99.13
2	64508061	64530359	22299	LG07	48807392	48785093	22300	99.07
2	64530345	64583618	53274	LG07	48785004	48731756	53249	98.74
2	64584532	64585192	661	LG07	48731415	48730755	661	99.85
2	64585195	64621283	36089	LG07	48730628	48694620	36009	99
2	64621291	64645913	24623	LG07	48694485	48669849	24637	99.07
2	64645908	64652028	6121	LG07	48669750	48663616	6135	97.22
2	64652470	64676804	24335	LG07	48663616	48639334	24283	98.85
2	64676806	64701276	24471	LG07	48637995	48613516	24480	98.7
2	64701435	64766236	64802	LG07	48613639	48548785	64855	98.68
2	64768498	64849933	81436	LG07	48548795	48467567	81229	98.68
2	64850103	65093095	242993	LG07	48467475	48224523	242953	99.05
2	65093083	65108834	15752	LG07	48224086	48208352	15735	99.52
2	65108822	65170810	61989	LG07	48207417	48145414	62004	99.16
2	65170799	65199904	29106	LG07	48145217	48116117	29101	99.02
2	65200213	65215970	15758	LG07	48116110	48100389	15722	99.21
2	65215968	65248592	32625	LG07	48099772	48067204	32569	99.13
2	65248592	65254356	5765	LG07	48067116	48061325	5792	97.79
2	65254496	65305361	50866	LG07	48061326	48010448	50879	98.99
2	65304995	65528144	223150	LG07	48010582	47787439	223144	99.14
2	65528130	65563470	35341	LG07	47786472	47751185	35288	98.9
2	65563470	65588382	24913	LG07	47751085	47726158	24928	98.82
2	65589466	65598110	8645	LG07	47726159	47717550	8610	98.83
2	65598101	65677529	79429	LG07	47717181	47637772	79410	99.13
2	65677529	65722396	44868	LG07	47637653	47592839	44815	99.23
2	65722387	65839745	117359	LG07	47589287	47471800	117488	99.01
2	65839736	65868172	28437	LG07	47470741	47442335	28407	99.35
2	65868263	65872006	3744	LG04	13255360	13251627	3734	99.23
2	65872007	65973342	101336	LG07	47442335	47340985	101351	99.09
2	65973437	65992237	18801	LG07	47340985	47322176	18810	99.37
2	65992429	66034056	41628	LG07	47322175	47280595	41581	98.94
2	66034044	66035748	1705	LG07	47280674	47278946	1729	96.72
2	66035746	66074476	38731	LG07	47277688	47238955	38734	99.09
2	66074461	66076226	1766	LG07	47238077	47236315	1763	98.92
2	66076318	66077742	1425	LG07	27369364	27367935	1430	98.6
2	66077739	66082236	4498	LG07	47236327	47231833	4495	99.33
2	66082416	66138416	56001	LG07	47231833	47175824	56010	98.97
2	66138416	66167064	28649	LG07	47175682	47147105	28578	98.7
2	66167283	66186561	19279	LG07	47147130	47127881	19250	98.77
2	66186560	66224207	37648	LG07	47126867	47089198	37670	99.14
2	66224207	66321249	97043	LG07	47089089	46991995	97095	99.19
2	66321368	66404250	82883	LG07	46991995	46909055	82941	98.96
2	66404230	66440599	36370	LG07	46909027	46872589	36439	98.75
2	66441454	66507614	66161	LG07	46872292	46806113	66180	99.1
2	66508256	66527942	19687	LG07	46805442	46785780	19663	98.77
2	66528060	66590592	62533	LG07	46785777	46723326	62452	99.3
2	66590750	66696260	105511	LG07	46723380	46617846	105535	99.48
2	66696243	66853352	157110	LG07	46609749	46452719	157031	99.1
2	66861117	66868725	7609	LG07	46452733	46445126	7608	98.1
2	66868872	66895243	26372	LG07	46445122	46418719	26404	98.45
2	66894349	66936282	41934	LG07	46418608	46376636	41973	98.76
2	66942639	66975391	32753	LG07	46376650	46343924	32727	98.91
2	66975373	66995358	19986	LG07	46343648	46323662	19987	98.96
2	66997778	67007537	9760	LG07	46323675	46313893	9783	98.66
2	67007730	67012015	4286	LG07	46313893	46309634	4260	98.07
2	67012669	67020166	7498	LG07	46309637	46302119	7519	98.26
2	67020153	67103487	83335	LG07	46301339	46218096	83244	98.81
2	67103630	67244112	140483	LG07	46218096	46077537	140560	99.15
2	67104649	67105386	738	LG07	46219836	46220576	741	97.57
2	67244667	67285625	40959	LG07	46077548	46036613	40936	98.93
2	67285607	67353337	67731	LG07	46036103	45968350	67754	99.31
2	67353336	67478040	124705	LG07	45966722	45842042	124681	99.22
2	67477994	67560381	82388	LG07	45841986	45759627	82360	98.62
2	67560382	67601564	41183	LG07	45759487	45718305	41183	99.46
2	67601500	67845834	244335	LG07	45718303	45473947	244357	99.02
2	67753787	67755437	1651	LG04	34892645	34891011	1635	97.88
2	67845934	67856150	10217	LG07	45473947	45463709	10239	98.62
2	67856152	67857193	1042	LG04	52257351	52256314	1038	99.04
2	67857699	67872714	15016	LG07	45463299	45448295	15005	98.13
2	67874333	67882478	8146	LG07	45448021	45439847	8175	98.88
2	67882465	67889095	6631	LG07	45438904	45432250	6655	98.56
2	67888199	67902051	13853	LG07	45432204	45418342	13863	98.57
2	67902036	67959420	57385	LG07	45417051	45359693	57359	99.06
2	67959628	67968194	8567	LG07	45359707	45351140	8568	99.16
2	67968211	68013879	45669	LG07	45351262	45305566	45697	98.98
2	68013874	68018845	4972	LG07	45304947	45299977	4971	99.1
2	68018955	68035176	16222	LG07	45299975	45283753	16223	99.03
2	68036680	68042431	5752	LG07	45283765	45278019	5747	97.99
2	68042808	68240518	197711	LG07	45278033	45080254	197780	99.07
2	68240504	68280591	40088	LG07	45080018	45039908	40111	98.86
2	68280715	68315499	34785	LG07	45039902	45005152	34751	99.02
2	68315495	68387142	71648	LG07	45005020	44933292	71729	99.11
2	68387371	68406802	19432	LG07	44933338	44913955	19384	98.36
2	68406593	68443506	36914	LG07	44914022	44877153	36870	98.47
2	68443506	68492633	49128	LG07	44876800	44827621	49180	99.24
2	68493102	68644266	151165	LG07	44827619	44676411	151209	99.27
2	68542590	68544648	2059	LG07	44784035	44786090	2056	95.25
2	68645056	68686516	41461	LG07	44675192	44633750	41443	98.99
2	68686510	68843648	157139	LG07	44633326	44476413	156914	98.91
2	68844859	69028216	183358	LG07	44476427	44293289	183139	99
2	69028545	69071972	43428	LG07	44293296	44249937	43360	99.24
2	69071972	69158941	86970	LG07	44249815	44162940	86876	99.17
2	69158943	69190236	31294	LG07	44163071	44131768	31304	99.33
2	69190220	69485580	295361	LG07	44130787	43835308	295480	99.09
2	69485629	69521900	36272	LG07	43835319	43799106	36214	99.12
2	69521765	69640443	118679	LG07	43799055	43680404	118652	99
2	69640604	69641567	964	LG07	43680381	43679419	963	98.76
2	69641582	69650914	9333	LG07	43678467	43669116	9352	98.35
2	69652136	69654619	2484	LG07	57559734	57562215	2482	98.59
2	69654626	69735727	81102	LG07	43669136	43588034	81103	99.16
2	69735713	69743334	7622	LG07	43587562	43579934	7629	99.48
2	69744637	69756994	12358	LG07	43579875	43567524	12352	98.45
2	69758798	69791470	32673	LG07	43567518	43534795	32724	98.68
2	69791460	69807498	16039	LG07	43533591	43517581	16011	98.54
2	69807483	69808506	1024	LG07	43509840	43508817	1024	99.61
2	69810397	69825764	15368	LG07	43508835	43493480	15356	99.51
2	69825750	69841200	15451	LG07	43491959	43476471	15489	98.95
2	69841319	69954920	113602	LG07	43476456	43362837	113620	99.1
2	69954901	70034832	79932	LG07	43362729	43282821	79909	98.95
2	70037036	70140003	102968	LG07	43282834	43179882	102953	98.92
2	70139989	70141818	1830	LG07	43178184	43176355	1830	98.58
2	70142688	70221535	78848	LG07	43176367	43097467	78901	99
2	70162695	70165659	2965	LG04	43618278	43621244	2967	99.09
2	70222236	70246356	24121	LG07	43095779	43071645	24135	98.84
2	70246484	70286100	39617	LG07	43071645	43032064	39582	98.89
2	70286230	70306776	20547	LG07	43032064	43011577	20488	98.91
2	70307765	70392213	84449	LG07	43011589	42927170	84420	99.1
2	70392213	70450696	58484	LG07	42926943	42868625	58319	98.87
2	70450717	70500678	49962	LG07	42867230	42817307	49924	98.9
2	70500672	70565061	64390	LG07	42817257	42752692	64566	99.1
2	70565061	70567401	2341	LG07	42752581	42750240	2342	98.72
2	70568053	70641087	73035	LG07	42750241	42677197	73045	99.11
2	70641066	70649050	7985	LG07	42677065	42669075	7991	99.21
2	70649075	70706388	57314	LG07	42668888	42611592	57297	99.11
2	70706654	70733757	27104	LG07	42611600	42584493	27108	98.81
2	70733758	70741082	7325	LG07	42583957	42576643	7315	99.07
2	70742741	70753313	10573	LG07	42575861	42565303	10559	97.79
2	70753311	70802300	48990	LG07	42565181	42516207	48975	98.88
2	70802515	70942867	140353	LG07	42516222	42375827	140396	98.94
2	70942854	71247778	304925	LG07	42375205	42070321	304885	98.75
2	71248949	71377334	128386	LG07	42070334	41942028	128307	99
2	71377335	71429268	51934	LG07	41941428	41889448	51981	99.33
2	71429253	71447129	17877	LG07	41889261	41871353	17909	98.66
2	71447110	71512700	65591	LG07	41870741	41805385	65357	98.85
2	71515528	71540128	24601	LG07	41805398	41780773	24626	99.11
2	71542808	71707963	165156	LG07	41780778	41615601	165178	99.07
2	71707960	71725859	17900	LG07	41615449	41597585	17865	99.02
2	71725858	71791886	66029	LG07	41596582	41530502	66081	99.13
2	71792518	71865658	73141	LG07	41530515	41457421	73095	99.42
2	71865764	71868156	2393	LG07	41457430	41455038	2393	99.58
2	71868883	71875310	6428	LG07	41455057	41448624	6434	99.52
2	71876593	72024267	147675	LG07	41448629	41300949	147681	99.29
2	72024257	72030974	6718	LG07	41296684	41289963	6722	99.63
2	72030961	72067741	36781	LG07	41288052	41251261	36792	99.39
2	72067763	72134884	67122	LG07	41251289	41184257	67033	99.29
2	72134871	72144791	9921	LG07	41183029	41173105	9925	98.22
2	72144795	72157081	12287	LG07	41172881	41160597	12285	98.54
2	72157079	72160429	3351	LG07	57558839	57562192	3354	99.23
2	72157768	72160426	2659	LG04	26720449	26723059	2611	97.3
2	72160413	72168682	8270	LG07	41160626	41152376	8251	98.45
2	72168851	72255710	86860	LG07	41152744	41065783	86962	98.99
2	72262348	72405725	143378	LG07	41065790	40922534	143257	99.01
2	72406551	72421653	15103	LG07	40922548	40907453	15096	99.15
2	72421639	72525788	104150	LG07	40906867	40802745	104123	99.1
2	72525786	72745586	219801	LG07	40801549	40581829	219721	99.23
2	72745586	72899061	153476	LG07	40581657	40428228	153430	99
2	72899046	72962312	63267	LG07	40426618	40363317	63302	98.53
2	72963636	73020234	56599	LG07	40360121	40303542	56580	98.84
2	73020232	73154703	134472	LG07	40303038	40168470	134569	98.96
2	73154703	73245469	90767	LG07	40168327	40077597	90731	99.37
2	73245470	73346929	101460	LG07	40077631	39976120	101512	99.27
2	73347021	73386672	39652	LG07	39976134	39936472	39663	99.22
2	73386742	73457990	71249	LG07	39936486	39865282	71205	99.48
2	73457990	73462530	4541	LG07	39865128	39860586	4543	98.7
2	73462519	73478536	16018	LG07	39857561	39841583	15979	99.07
2	73478601	73508101	29501	LG07	39841598	39812124	29475	99.27
2	73508094	73593259	85166	LG07	39811966	39726700	85267	99.13
2	73593740	73611256	17517	LG07	39726731	39709223	17509	99.17
2	73611255	73631068	19814	LG07	39709101	39689289	19813	99.04
2	73631068	73724896	93829	LG07	39689153	39595190	93964	98.86
2	73724884	73772816	47933	LG07	39593605	39545689	47917	98.25
2	73772816	73774720	1905	LG07	39544119	39542232	1888	97.85
2	73774720	73813096	38377	LG07	39541977	39503585	38393	99.33
2	73813425	73846034	32610	LG07	39503595	39471037	32559	99.18
2	73847392	73879256	31865	LG07	39471054	39439232	31823	99.17
2	73879298	73880397	1100	LG07	24931143	24932245	1103	99.09
2	73881155	73902109	20955	LG07	39439229	39418272	20958	99.35
2	73902093	73914668	12576	LG07	39415794	39403216	12579	99.53
2	73914654	73924014	9361	LG07	39402945	39393572	9374	99.24
2	73924660	73925540	881	LG04	3527066	3526185	882	99.43
2	73924660	73926884	2225	LG04	88674056	88671831	2226	98.88
2	73926575	73928100	1526	LG07	31647382	31645857	1526	99.54
2	73932386	73952506	20121	LG07	39393586	39373466	20121	98.94
2	73952083	74128475	176393	LG07	39365036	39188589	176448	99.11
2	74128382	74272031	143650	LG07	39188589	39044915	143675	99.22
2	74272017	74347703	75687	LG07	39037135	38961495	75641	99.5
2	74349019	74431595	82577	LG07	38961504	38878905	82600	99.47
2	74432209	74437790	5582	LG07	38878911	38873335	5577	98.85
2	74438779	74479087	40309	LG07	38873349	38833021	40329	99.28
2	74479074	74499533	20460	LG07	38832587	38812129	20459	99.79
2	74499535	74586172	86638	LG07	38812031	38725401	86631	99.69
2	74504182	74505425	1244	LG07	38809056	38810307	1252	96.73
2	74586174	74725562	139389	LG07	38724074	38584727	139348	99.67
2	74725548	74734419	8872	LG07	38584704	38575833	8872	99.7
2	74734418	74797794	63377	LG07	38575449	38512052	63398	99.54
2	74798044	74857410	59367	LG07	38511086	38451741	59346	99.08
2	74858642	74886177	27536	LG07	38451747	38424211	27537	98.88
2	74886177	75091577	205401	LG07	38424044	38218575	205470	98.97
2	75091702	75322694	230993	LG07	38218575	37987602	230974	99.38
2	75322746	75398273	75528	LG07	37987606	37912059	75548	99.19
2	75402878	75450453	47576	LG07	37912035	37864351	47685	98.65
2	75450453	75499185	48733	LG07	37864264	37815479	48786	99.24
2	75501513	75669654	168142	LG07	37815493	37647271	168223	99.1
2	75669640	75744567	74928	LG07	37646084	37571180	74905	99.18
2	75744567	75816121	71555	LG07	37570906	37499369	71538	99.21
2	75816122	75881572	65451	LG07	37499108	37433686	65423	98.6
2	75881715	75966802	85088	LG07	37433686	37348595	85092	99.14
2	75968705	75982948	14244	LG07	37348595	37334328	14268	98.52
2	75983200	76043932	60733	LG07	37336207	37275544	60664	98.55
2	76043932	76067777	23846	LG07	37275417	37251572	23846	98.95
2	76067416	76103856	36441	LG07	37250203	37213806	36398	98.85
2	76103839	76132907	29069	LG07	37212274	37183260	29015	98.83
2	76133052	76160322	27271	LG07	37183258	37155978	27281	98.47
2	76160322	76180512	20191	LG07	37155876	37135683	20194	98.88
2	76181419	76269408	87990	LG07	37135683	37047631	88053	99.18
2	76270884	76284707	13824	LG07	37044359	37030557	13803	98.92
2	76284693	76477011	192319	LG07	37027284	36835075	192210	99.02
2	76477148	76547029	69882	LG07	36835074	36765166	69909	99.54
2	76546920	76635047	88128	LG07	36765131	36676958	88174	99.39
2	76635046	76729377	94332	LG07	36676626	36582250	94377	99.16
2	76729664	76774484	44821	LG07	36582244	36537379	44866	99.1
2	76774711	76852525	77815	LG07	36537347	36459509	77839	98.78
2	76852520	76924454	71935	LG07	36459222	36387366	71857	98.84
2	76925072	76947998	22927	LG07	36385495	36362632	22864	98.51
2	76948176	76997247	49072	LG07	36362631	36313580	49052	98.9
2	76999234	77013726	14493	LG07	36313592	36299076	14517	98.71
2	77013711	77084802	71092	LG07	36298982	36227909	71074	99.11
2	77084792	77110713	25922	LG07	36227569	36201631	25939	99.06
2	77110705	77199210	88506	LG07	36200929	36112429	88501	99.22
2	77200008	77237428	37421	LG07	36112428	36075030	37399	99.35
2	77237542	77280387	42846	LG07	36075030	36032158	42873	98.62
2	77280387	77300770	20384	LG07	36031999	36011622	20378	98.97
2	77300770	77333608	32839	LG07	36011508	35978670	32839	98.9
2	77333709	77344608	10900	LG07	35978678	35967771	10908	98.74
2	77344863	77376695	31833	LG07	35967788	35935997	31792	98.79
2	77376809	77388736	11928	LG07	35935997	35924081	11917	99.38
2	77389547	77496937	107391	LG07	35924024	35816535	107490	99.23
2	77496935	77565137	68203	LG07	35815819	35747596	68224	98.66
2	77565358	77569883	4526	LG07	35747598	35743070	4529	98.21
2	77571068	77582231	11164	LG07	35743073	35731923	11151	98.23
2	77582242	77646017	63776	LG07	35728506	35664702	63805	99
2	77646017	77657075	11059	LG07	35664567	35653483	11085	98.8
2	77657061	77713106	56046	LG07	35653102	35597207	55896	98.92
2	77713619	77728578	14960	LG07	35597215	35582212	15004	98.06
2	77728580	77785296	56717	LG07	35582060	35525382	56679	98.87
2	77785291	77812290	27000	LG07	35525231	35498315	26917	98.62
2	77812459	77829499	17041	LG07	35498313	35481267	17047	98.09
2	77829484	77888621	59138	LG07	35481120	35422134	58987	98.82
2	77888624	78002106	113483	LG07	35421476	35308050	113427	98.55
2	78002093	78125449	123357	LG07	35305754	35182386	123369	98.64
2	78125436	78138051	12616	LG07	35181403	35168789	12615	99.04
2	78138054	78184582	46529	LG07	35168568	35122034	46535	99.09
2	78185464	78224626	39163	LG07	35122049	35082896	39154	98.82
2	78224620	78244247	19628	LG07	35082122	35062440	19683	98.35
2	78245990	78300147	54158	LG07	35062454	35008284	54171	99.04
2	78300141	78330702	30562	LG07	35005958	34975433	30526	98.59
2	78330701	78334982	4282	LG07	34974837	34970560	4278	99.07
2	78334963	78350149	15187	LG07	34969663	34954438	15226	98.21
2	78350269	78357204	6936	LG07	34954438	34947581	6858	98.16
2	78357204	78374195	16992	LG07	34947431	34930458	16974	98.61
2	78376421	78395291	18871	LG07	34930471	34911627	18845	98.9
2	78395503	78431659	36157	LG07	34911621	34875481	36141	98.92
2	78431600	78443954	12355	LG07	34875480	34863081	12400	98.11
2	78444186	78451480	7295	LG07	34863081	34855771	7311	98.29
2	78451483	78498254	46772	LG07	34854958	34808232	46727	98.58
2	78499198	78518891	19694	LG07	34807842	34788156	19687	97.92
2	78517165	78552069	34905	LG07	34788121	34753211	34911	98.79
2	78554778	78588115	33338	LG07	34753212	34719824	33389	98.78
2	78588301	78589369	1069	LG07	34719820	34718752	1069	99.44
2	78589507	78595934	6428	LG07	34718760	34712341	6420	99.25
2	78595934	78627489	31556	LG07	34712433	34680933	31501	98.96
2	78627622	78675858	48237	LG07	34680932	34632496	48437	98.84
2	78675846	78685977	10132	LG07	34631337	34621200	10138	99
2	78685977	78687576	1600	LG04	2485028	2486608	1581	98.06
2	78685977	78686759	783	LG04	38535094	38534312	783	99.62
2	78687630	78700017	12388	LG07	34621212	34608805	12408	98.79
2	78700159	78701682	1524	LG07	34605963	34604441	1523	98.56
2	78701668	78733065	31398	LG07	34603916	34572543	31374	98.74
2	78733061	78757120	24060	LG07	34572352	34548320	24033	98.75
2	78756935	78800040	43106	LG07	34548317	34505192	43126	98.73
2	78800044	78806814	6771	LG07	34504528	34497758	6771	98.57
2	78808100	78809152	1053	LG07	34496170	34495118	1053	99.24
2	78811417	78827104	15688	LG07	34495083	34479368	15716	99.24
2	78829222	78864833	35612	LG07	34479381	34443812	35570	98.62
2	78865805	78884955	19151	LG07	34443818	34424640	19179	99.02
2	78885603	78910995	25393	LG07	34424652	34399267	25386	98.99
2	78911133	78956434	45302	LG07	34399254	34353976	45279	99.22
2	78921201	78921738	538	LG04	19290775	19291312	538	99.81
2	78921209	78921738	530	LG07	68830792	68831321	530	100
2	78956430	79012141	55712	LG07	34353734	34297969	55766	99.25
2	79012125	79025590	13466	LG07	34295997	34282536	13462	99.12
2	79025600	79040489	14890	LG07	34282058	34267147	14912	98.39
2	79040811	79052817	12007	LG07	34267147	34255138	12010	98.2
2	79052812	79057770	4959	LG07	34253574	34248618	4957	98.41
2	79057770	79076365	18596	LG07	34248391	34229776	18616	98.67
2	79076353	79093042	16690	LG07	34228662	34211950	16713	98.68
2	79094350	79122881	28532	LG07	34211975	34183450	28526	99.33
2	79122914	79145175	22262	LG07	34182743	34160484	22260	98.44
2	79145173	79154192	9020	LG07	34159390	34150364	9027	98.25
2	79155976	79176551	20576	LG07	34150360	34129792	20569	99.19
2	79177257	79179501	2245	LG07	34129798	34127545	2254	98.4
2	79179501	79200234	20734	LG07	34127458	34106737	20722	97.83
2	79200496	79204708	4213	LG07	34106751	34102529	4223	97.29
2	79204712	79257135	52424	LG07	34101383	34048981	52403	98.6
2	79261591	79271618	10028	LG07	34049219	34039198	10022	98.95
2	79271612	79278826	7215	LG07	34038987	34031770	7218	98.95
2	79279022	79290183	11162	LG07	34031779	34020621	11159	98.4
2	79290502	79300136	9635	LG07	34019129	34009539	9591	97.66
2	79301247	79340538	39292	LG07	34006891	33967597	39295	98.35
2	79341230	79362050	20821	LG07	33967611	33946846	20766	97.97
2	79362321	79366354	4034	LG07	33946846	33942803	4044	98.25
2	79366466	79368785	2320	LG07	33942803	33940484	2320	98.71
2	79368782	79391933	23152	LG07	33938778	33915623	23156	98.14
2	79391933	79439980	48048	LG07	33915535	33867498	48038	98.77
2	79441198	79470556	29359	LG07	33867501	33838143	29359	98.59
2	79470553	79485853	15301	LG07	33837325	33822009	15317	98.48
2	79486132	79519616	33485	LG07	33822025	33788519	33507	98.8
2	79520187	79573061	52875	LG07	33788534	33735680	52855	98.82
2	79573061	79580147	7087	LG07	33735581	33728493	7089	99.46
2	79580125	79699813	119689	LG07	33726896	33607085	119812	99.15
2	79699810	79709525	9716	LG07	33603386	33593647	9740	98.61
2	79709604	79730962	21359	LG07	33593663	33572295	21369	99.03
2	79730946	79830092	99147	LG07	33571404	33472195	99210	99
2	79829885	79846654	16770	LG07	33471812	33455068	16745	98.6
2	79846783	79849232	2450	LG07	33455066	33452617	2450	98.86
2	79849224	79906345	57122	LG07	33452417	33395300	57118	99
2	79906478	79910859	4382	LG07	33395300	33390939	4362	98.17
2	79914007	79936428	22422	LG07	33389165	33366643	22523	98.07
2	79937301	79986688	49388	LG07	33366862	33317430	49433	98.74
2	79988176	80008042	19867	LG07	33318277	33298449	19829	98.01
2	80009863	80013934	4072	LG07	33298452	33294381	4072	98.55
2	80015509	80054532	39024	LG07	33294390	33255345	39046	98.64
2	80054535	80095449	40915	LG07	33255039	33214172	40868	98.59
2	80095440	80106885	11446	LG07	33213620	33202182	11439	98.79
2	80107183	80134681	27499	LG07	33201500	33173992	27509	98.83
2	80134891	80165141	30251	LG07	33173999	33143771	30229	98.17
2	80165240	80203997	38758	LG07	33143767	33105000	38768	99.35
2	80203873	80238380	34508	LG07	33104994	33070377	34618	98.67
2	80239751	80270107	30357	LG07	33068051	33037646	30406	98.43
2	80270298	80277355	7058	LG07	33037646	33030575	7072	98.12
2	80277662	80322341	44680	LG07	33030584	32985918	44667	99.04
2	80324275	80388958	64684	LG07	32985941	32921139	64803	98.6
2	80388964	80446115	57152	LG07	32918087	32860931	57157	98.85
2	80446115	80472074	25960	LG07	32860650	32834681	25970	98.3
2	80472092	80474287	2196	LG04	108095480	108097675	2196	99.41
2	80474592	80487515	12924	LG07	32834379	32821419	12961	98.26
2	80490898	80501911	11014	LG07	32821432	32810395	11038	97.81
2	80501910	80591904	89995	LG07	32809953	32719978	89976	99.23
2	80591916	80621900	29985	LG07	32719781	32689797	29985	98.77
2	80621904	80632911	11008	LG07	32689684	32678675	11010	99.11
2	80633175	80643822	10648	LG07	32678675	32668022	10654	98.51
2	80643808	80649229	5422	LG07	32667398	32661974	5425	98.23
2	80649229	80680035	30807	LG07	32661846	32631033	30814	99.51
2	80680196	80691378	11183	LG07	32631033	32619776	11258	97.12
2	80691382	80692376	995	LG07	32619536	32618540	997	99.1
2	80692317	80720927	28611	LG07	32618562	32590095	28468	98.03
2	80721267	80734042	12776	LG07	32590093	32577337	12757	99.07
2	80734072	80741979	7908	LG07	32577195	32569300	7896	97.55
2	80741965	80750009	8045	LG07	32568659	32560623	8037	98.42
2	80750391	80774951	24561	LG07	32560623	32536032	24592	99.05
2	80775369	80784178	8810	LG07	32536048	32527217	8832	98.38
2	80784171	80804934	20764	LG07	32526638	32505872	20767	98.24
2	80806455	80823113	16659	LG07	32504572	32487939	16634	98.89
2	80825050	80829214	4165	LG07	32487954	32483792	4163	98.73
2	80829543	80865296	35754	LG07	32483804	32448025	35780	98.88
2	80865285	80941417	76133	LG07	32444480	32368342	76139	99.26
2	80941419	81000947	59529	LG07	32368202	32308668	59535	99.23
2	81000936	81028919	27984	LG07	32308063	32280181	27883	98.75
2	81028923	81034713	5791	LG07	32279917	32274125	5793	98.91
2	81035032	81038918	3887	LG07	32274098	32270206	3893	98.67
2	81038913	81056365	17453	LG07	32270072	32252594	17479	99.2
2	81056245	81094595	38351	LG07	32252578	32214228	38351	99.01
2	81095403	81096329	927	LG07	92977793	92978719	927	99.57
2	81095409	81096405	997	LG04	10494943	10495939	997	99.5
2	81096404	81145127	48724	LG07	32214244	32165485	48760	99.08
2	81145126	81167248	22123	LG07	32164947	32142830	22118	98.7
2	81167360	81191307	23948	LG07	32142830	32118913	23918	98.83
2	81195293	81200324	5032	LG07	32118916	32113887	5030	99.3
2	81200310	81209073	8764	LG07	32106160	32097393	8768	98.27
2	81212940	81230339	17400	LG07	32096517	32079103	17415	98.94
2	81232198	81283613	51416	LG07	32079116	32027787	51330	99.09
2	81283598	81424239	140642	LG07	32026590	31885881	140710	98.93
2	81425067	81630919	205853	LG07	31885877	31679985	205893	98.98
2	81630923	81682594	51672	LG07	31678953	31627317	51637	98.74
2	81682720	81726629	43910	LG07	31627343	31583387	43957	98.81
2	81726629	81731131	4503	LG07	31583273	31578780	4494	98.65
2	81731145	81782199	51055	LG07	31577197	31526157	51041	98.88
2	81782326	81802351	20026	LG07	31526154	31506104	20051	98.45
2	81802492	81807001	4510	LG07	31506104	31501608	4497	98.63
2	81808694	81817345	8652	LG07	31501623	31492979	8645	99.23
2	81817457	81862866	45410	LG07	31492979	31447581	45399	98.81
2	81862858	81977706	114849	LG07	31445739	31330837	114903	99.03
2	81977706	82004954	27249	LG07	31330574	31303330	27245	99.31
2	82004951	82005694	744	LG04	41206771	41206028	744	99.46
2	82008036	82071799	63764	LG07	31303343	31239625	63719	98.78
2	82073969	82132852	58884	LG07	31239944	31181139	58806	99.36
2	82133630	82240642	107013	LG07	31181143	31074137	107007	98.77
2	82240755	82242989	2235	LG07	31074129	31071899	2231	98.26
2	82244027	82272739	28713	LG07	31071910	31043174	28737	99.36
2	82272725	82297370	24646	LG07	31042487	31017852	24636	99.29
2	82297379	82312836	15458	LG07	31017189	31001739	15451	98.96
2	82312831	82352793	39963	LG07	31001150	30961104	40047	98.7
2	82352789	82431992	79204	LG07	30960241	30881085	79157	98.98
2	82433652	82461248	27597	LG07	30881102	30853523	27580	99.3
2	82461250	82491612	30363	LG07	30852629	30822268	30362	99.5
2	82491842	82498356	6515	LG07	30822258	30815739	6520	99.75
2	82498379	82505372	6994	LG07	30815335	30808343	6993	98.94
2	82505360	82510916	5557	LG07	30808158	30802595	5564	98.62
2	82511080	82526951	15872	LG07	30802610	30786732	15879	99.12
2	82526936	82676066	149131	LG07	30782224	30633140	149085	98.99
2	82676712	82858431	181720	LG07	30633182	30451386	181797	98.98
2	82839602	82841090	1489	LG07	30471918	30473418	1501	93.83
2	82858631	82867675	9045	LG07	30451385	30442397	8989	97.86
2	82867877	82881737	13861	LG07	30442397	30428586	13812	98.24
2	82882425	82900108	17684	LG07	30428601	30410910	17692	99.33
2	82900257	82942230	41974	LG07	30410928	30369001	41928	98.94
2	82942216	82964841	22626	LG07	30368117	30345492	22626	99.53
2	82964991	82970329	5339	LG07	30345482	30340144	5339	99.31
2	82970416	83347218	376803	LG07	30340144	29963302	376843	99.24
2	83347219	83389895	42677	LG07	29962360	29919663	42698	98.83
2	83389884	83497221	107338	LG07	29919248	29811855	107394	98.57
2	83497222	83718662	221441	LG07	29811717	29590159	221559	99.19
2	83718650	83723380	4731	LG07	29587065	29582334	4732	99.28
2	83723252	83729859	6608	LG07	29582339	29575726	6614	98.79
2	83731897	83760988	29092	LG07	29573901	29544830	29072	98.6
2	83760989	83763741	2753	LG07	29544976	29542224	2753	99.38
2	83763728	83974292	210565	LG07	29541949	29331371	210579	98.98
2	83974289	83975600	1312	LG04	14118066	14119381	1316	98.02
2	83975601	83989220	13620	LG07	29331376	29317741	13636	98.72
2	83989208	84304260	315053	LG07	29314643	28999660	314984	99.03
2	84304261	84321621	17361	LG07	28999750	28982379	17372	99.37
2	84321607	84346482	24876	LG07	28980594	28955704	24891	99.05
2	84347183	84395804	48622	LG07	28955701	28907041	48661	98.83
2	84395803	84400165	4363	LG07	68772910	68768538	4373	98.38
2	84403552	84414951	11400	LG07	28907054	28895640	11415	99.41
2	84415039	84440050	25012	LG07	28895640	28870550	25091	98.78
2	84441897	84545690	103794	LG07	28870550	28766617	103934	98.88
2	84547039	84558245	11207	LG07	28766630	28755439	11192	99.19
2	84557842	84564067	6226	LG07	28755452	28749234	6219	98.19
2	84564053	84591626	27574	LG07	28747601	28720068	27534	98.06
2	84591607	84721265	129659	LG07	28719337	28589662	129676	99.22
2	84721258	84758919	37662	LG07	28581936	28544284	37653	98.97
2	84758918	84768517	9600	LG07	28544363	28534767	9597	98.99
2	84768287	85074294	306008	LG07	28534810	28228914	305897	99.27
2	85074287	85076966	2680	LG04	47658074	47660753	2680	99.48
2	85074287	85076965	2679	LG04	54051815	54049137	2679	98.99
2	85077003	85172868	95866	LG07	28228937	28133070	95868	99.01
2	85172872	85212145	39274	LG07	28132948	28093663	39286	98.91
2	85212641	85295637	82997	LG07	28093664	28010635	83030	99.2
2	85295790	85379801	84012	LG07	28010636	27926692	83945	99.17
2	85379935	85490426	110492	LG07	27926705	27816155	110551	99.02
2	85490424	85497317	6894	LG07	27815638	27808747	6892	99.26
2	85497860	85505937	8078	LG07	27808742	27800669	8074	98.64
2	85506455	85549511	43057	LG07	27800683	27757620	43064	99.07
2	85549511	85581105	31595	LG07	27757485	27725891	31595	99.13
2	85581097	85648231	67135	LG07	27724085	27656986	67100	99.08
2	85648235	85696667	48433	LG07	27656330	27607916	48415	99.13
2	85696664	85736198	39535	LG07	27607626	27568109	39518	99.08
2	85743921	85846775	102855	LG07	27568120	27465162	102959	98.98
2	85847125	85931504	84380	LG07	27465164	27380759	84406	99.38
2	85931570	85969906	38337	LG07	27380773	27342464	38310	98.77
2	85969886	85993275	23390	LG07	27342069	27318656	23414	99.02
2	85993261	86009491	16231	LG07	27316052	27299825	16228	99.48
2	86009490	86054259	44770	LG07	27299270	27254455	44816	98.82
2	86054191	86093191	39001	LG07	27253036	27214078	38959	99.3
2	86093177	86219404	126228	LG07	27213326	27087151	126176	99.03
2	86219404	86271659	52256	LG07	27087055	27034825	52231	99.02
2	86271658	86322911	51254	LG07	27034555	26983274	51282	99.11
2	86322905	86328066	5162	LG07	26982161	26976994	5168	99.26
2	86327928	86360111	32184	LG07	26976993	26944779	32215	98.62
2	86360118	86419558	59441	LG07	26944672	26885113	59560	98.64
2	86419928	86602439	182512	LG07	26885122	26702616	182507	98.82
2	86602439	86643810	41372	LG07	26702473	26661126	41348	98.65
2	86643810	86651368	7559	LG07	26660967	26653342	7626	98.16
2	86651640	86804559	152920	LG07	26653357	26500416	152942	98.81
2	86804544	86818072	13529	LG07	26500019	26486519	13501	98.5
2	86818109	86818765	657	LG04	71997185	71996530	656	99.24
2	86818842	86821746	2905	LG07	26486532	26483628	2905	99.21
2	86821732	86917431	95700	LG07	26480916	26385247	95670	98.85
2	86917435	86930885	13451	LG07	26385297	26371858	13440	99.32
2	86930872	86945836	14965	LG07	26370233	26355279	14955	99.23
2	86945979	86976017	30039	LG07	26355278	26325257	30022	98.78
2	86977572	87051705	74134	LG07	26325219	26251062	74158	98.93
2	87052446	87223795	171350	LG07	26251070	26079734	171337	99.2
2	87223802	87230101	6300	LG07	26078087	26071778	6310	98.67
2	87230288	87459402	229115	LG07	26071780	25842680	229101	99.17
2	87459534	87617403	157870	LG07	25842693	25684833	157861	99.27
2	87617393	87714175	96783	LG07	25684627	25587813	96815	99.15
2	87716303	87780934	64632	LG07	25586024	25521360	64665	99.02
2	87780297	87783680	3384	LG07	25521479	25518119	3361	97.99
2	87783694	87852962	69269	LG07	25518007	25448789	69219	98.9
2	87852964	87964760	111797	LG07	25448584	25336871	111714	99.01
2	87964760	88059255	94496	LG07	25336752	25242292	94461	99.07
2	88059246	88068428	9183	LG07	25241925	25232744	9182	98.97
2	88068416	88314957	246542	LG07	25229974	24983351	246624	99.09
2	88314940	88349890	34951	LG07	24983315	24948435	34881	99.04
2	88352949	88368574	15626	LG07	24947865	24932245	15621	99.12
2	88368571	88386911	18341	LG07	24931144	24912807	18338	99.36
2	88386911	88424944	38034	LG07	24912700	24874781	37920	98.99
2	88426739	88499860	73122	LG07	24875161	24802089	73073	99.29
2	88499961	88544820	44860	LG07	24802096	24757137	44960	98.94
2	88544823	88594244	49422	LG07	24757200	24707839	49362	98.99
2	88594249	88630728	36480	LG07	24705765	24669311	36455	98.92
2	88630719	88761452	130734	LG07	24668997	24538315	130683	99.27
2	88761452	88820959	59508	LG07	24538227	24478736	59492	99.16
2	88820950	88824979	4030	LG07	24478512	24474488	4025	98.96
2	88824976	89021780	196805	LG07	24474656	24277835	196822	98.94
2	89021816	89085278	63463	LG07	24277529	24214102	63428	98.93
2	89085273	89174098	88826	LG07	24213784	24124855	88930	99.26
2	89174107	89184894	10788	LG07	24123828	24113029	10800	99.59
2	89184881	89200864	15984	LG07	24112257	24096277	15981	99.19
2	89200866	89298847	97982	LG07	24096315	23998351	97965	99.16
2	89299251	89380244	80994	LG07	23997801	23916792	81010	98.71
2	89380410	89398505	18096	LG07	23916945	23898829	18117	98.96
2	89398505	89423319	24815	LG07	23898924	23874123	24802	98.93
2	89423317	89424165	849	LG04	76760488	76761336	849	98.7
2	89424165	89614331	190167	LG07	23874122	23684062	190061	98.99
2	89613323	89628326	15004	LG07	23684941	23669936	15006	98.6
2	89627544	89662014	34471	LG07	23669858	23635420	34439	99.19
2	89662516	89691501	28986	LG07	23635433	23606454	28980	98.93
2	89691497	89699252	7756	LG07	12882986	12875238	7749	98.86
2	89699254	89763797	64544	LG07	23606467	23541896	64572	98.99
2	89763453	89840943	77491	LG07	23541801	23464137	77665	98.45
2	89794244	89798290	4047	LG07	22964643	22968692	4050	96.91
2	89800834	89813531	12698	LG07	22836411	22849124	12714	96.79
2	89803365	89815508	12144	LG07	22979413	22991543	12131	96.74
2	89809008	89823074	14067	LG07	23421385	23407305	14081	97.06
2	89824214	89845200	20987	LG07	23405920	23384975	20946	98.8
2	89847294	89860691	13398	LG07	23384989	23371598	13392	98.03
2	89848394	89882089	33696	LG07	23456596	23422932	33665	97.28
2	89861234	89888901	27668	LG07	22849719	22877384	27666	96.8
2	89881275	89892803	11529	LG07	23383128	23371598	11531	97.7
2	89892801	89914473	21673	LG07	23370662	23349000	21663	98.29
2	89899605	89932443	32839	LG07	22892134	22924954	32821	97.26
2	89929699	89989063	59365	LG07	23351631	23292264	59368	99.23
2	89986882	89989063	2182	LG07	22968599	22970791	2193	96.81
2	89989061	89994280	5220	LG07	22834001	22839232	5232	93.31
2	89992728	90006503	13776	LG07	22987214	23001004	13791	96.08
2	90006512	90039266	32755	LG07	23255580	23222803	32778	97.78
2	90011894	90036606	24713	LG07	23016951	23041657	24707	97.95
2	90036596	90044316	7721	LG07	23041829	23049561	7733	98.71
2	90039413	90075741	36329	LG07	23220747	23184420	36328	99.18
2	90075352	90205744	130393	LG07	23184357	23053950	130408	99.11
2	90205744	90217935	12192	LG07	23054053	23041829	12225	98.35
2	90215265	90263928	48664	LG07	23222803	23271520	48718	97.99
2	90217925	90242634	24710	LG07	23041657	23016951	24707	98.63
2	90243170	90263928	20759	LG07	22896955	22876189	20767	96.14
2	90243996	90258781	14786	LG07	23009090	22994286	14805	97
2	90273037	90288216	15180	LG07	22907294	22892134	15161	97.21
2	90273352	90294267	20916	LG07	23349000	23369918	20919	97.83
2	90294264	90301844	7581	LG07	22992628	22985039	7590	97.34
2	90294264	90304943	10680	LG07	23373190	23383884	10695	96.75
2	90294264	90307716	13453	LG07	23445910	23459345	13436	96.55
2	90294264	90301844	7581	LG07	23488554	23496146	7593	96.92
2	90326061	90333316	7256	LG07	23455115	23462352	7238	98.06
2	90348763	90366899	18137	LG07	23455115	23473226	18112	98.01
2	90368557	90391724	23168	LG07	23398286	23421474	23189	97.99
2	90368557	90377321	8765	LG07	23473211	23482006	8796	98.24
2	90373830	90391635	17806	LG07	23002849	22985039	17811	96.46
2	90373841	90391635	17795	LG07	23257814	23275611	17798	96.5
2	90377514	90391556	14043	LG07	23482008	23496067	14060	96.77
2	90386205	90551314	165110	LG07	22877537	22712436	165102	98.73
2	90415113	90427310	12198	LG07	23492129	23504316	12188	96.72
2	90428714	90437116	8403	LG07	23291141	23299557	8417	97.46
2	90510283	90528278	17996	LG07	22729005	22711010	17996	98.05
2	90550410	90704207	153798	LG07	22737791	22583962	153830	99.27
2	90565739	90593986	28248	LG07	22746915	22718686	28230	97.53
2	90704183	91138105	433923	LG07	22583860	22149795	434066	99.18
2	90982973	90985511	2539	LG07	22299676	22302202	2527	93.87
2	90985783	90988309	2527	LG07	22302474	22305013	2540	93.87
2	91138253	91288696	150444	LG07	22149810	21999295	150516	99.23
2	91288872	91326284	37413	LG07	21998864	21961378	37487	98.63
2	91326163	91369208	43046	LG07	21961363	21918342	43022	99.12
2	91370066	91421341	51276	LG07	21918340	21867011	51330	99.04
2	91421654	91436784	15131	LG07	21867014	21851859	15156	98.6
2	91436779	91509392	72614	LG07	21851790	21779160	72631	99.13
2	91509382	91534609	25228	LG07	21775054	21749824	25231	98.9
2	91534593	91536281	1689	LG07	21749234	21747546	1689	98.93
2	91536180	91651766	115587	LG07	21747597	21631986	115612	98.89
2	91651766	91664240	12475	LG07	21629556	21617083	12474	98.23
2	91664226	91752249	88024	LG07	21615582	21527510	88073	99.1
2	91753160	91760233	7074	LG07	21527525	21520449	7077	99.56
2	91760370	91776278	15909	LG07	21520471	21504564	15908	99.44
2	91776268	91836420	60153	LG07	21496799	21436612	60188	98.79
2	91836420	91915410	78991	LG07	21435507	21356448	79060	98.99
2	91915415	91923160	7746	LG04	105519000	105511245	7756	98.83
2	91923162	91968320	45159	LG07	21356470	21311459	45012	98.66
2	91968540	91991399	22860	LG07	21311472	21288630	22843	99.18
2	91991942	91999525	7584	LG07	21288640	21281057	7584	98.49
2	91999667	92035119	35453	LG07	21281057	21245627	35431	99.16
2	92039602	92071749	32148	LG07	21242422	21210239	32184	98.79
2	92071739	92117840	46102	LG07	21209943	21163850	46094	98.9
2	92117840	92211781	93942	LG07	21163721	21069831	93891	98.88
2	92211948	92213202	1255	LG07	21069831	21068574	1258	98.73
2	92213459	92272615	59157	LG07	21067768	21008562	59207	98.09
2	92272762	92281193	8432	LG07	21008562	21000122	8441	99.1
2	92281179	92404676	123498	LG07	20999047	20875532	123516	98.98
2	92404934	92452066	47133	LG07	20875543	20828462	47082	99.03
2	92452052	92457631	5580	LG07	20824792	20819215	5578	99.03
2	92457827	92589511	131685	LG07	20819215	20687680	131536	98.93
2	92589513	92622495	32983	LG07	20687501	20654501	33001	99.32
2	92622777	92650159	27383	LG07	20654502	20627061	27442	98.57
2	92650158	92684337	34180	LG07	20626334	20592157	34178	99.29
2	92684337	92824014	139678	LG07	20592010	20452423	139588	99.15
2	92824015	92933686	109672	LG07	20452685	20343007	109679	99.1
2	92933616	93008742	75127	LG07	20343007	20267931	75077	99.34
2	93008742	93029858	21117	LG07	20267763	20246622	21142	99.4
2	93029853	93038942	9090	LG07	20245899	20236767	9133	99.27
2	93039179	93128890	89712	LG07	20236772	20146997	89776	99.32
2	93129417	93217889	88473	LG07	20144984	20056537	88448	99.43
2	93218934	93262110	43177	LG07	20056535	20013374	43162	99.27
2	93262325	93334834	72510	LG07	20013369	19940884	72486	99.52
2	93335107	93434270	99164	LG07	19940458	19841180	99279	98.85
2	93434272	93442349	8078	LG07	19841007	19832922	8086	98.94
2	93442973	93495155	52183	LG07	19832925	19780744	52182	99.31
2	93496281	93523361	27081	LG07	19780758	19753650	27109	99.21
2	93523419	93529588	6170	LG07	19753486	19747320	6167	99.3
2	93529587	93530414	828	LG07	33727767	33726938	830	99.16
2	93530415	93551792	21378	LG07	19747328	19725955	21374	99.19
2	93551482	93561587	10106	LG07	19724455	19714380	10076	97.81
2	93561469	93567101	5633	LG07	19710999	19705366	5634	98.53
2	93567310	93597190	29881	LG07	19705368	19675471	29898	98.59
2	93597313	93646295	48983	LG07	19675455	19626441	49015	99.01
2	93646280	93670049	23770	LG07	19623040	19599289	23752	99.05
2	93670052	93694715	24664	LG07	19599168	19574519	24650	99.01
2	93694713	93825782	131070	LG07	19574075	19442937	131139	99.18
2	93827280	93880752	53473	LG07	19442950	19389563	53388	98.96
2	93881834	93911197	29364	LG07	19389558	19360132	29427	98.97
2	93911322	93912622	1301	LG07	19360132	19358838	1295	98.62
2	93912621	93938014	25394	LG07	19358675	19333224	25452	98.61
2	93938500	93949379	10880	LG07	19333162	19322213	10950	98.47
2	93949559	93979839	30281	LG07	19322211	19291878	30334	99.14
2	93979954	94003984	24031	LG07	19291878	19267666	24213	97.66
2	94004825	94042659	37835	LG07	19267663	19229834	37830	99.16
2	94042659	94123712	81054	LG07	19229503	19148483	81021	98.73
2	94123712	94145048	21337	LG07	19144489	19123123	21367	98.75
2	94145049	94148322	3274	LG07	19122908	19119642	3267	99.11
2	94148325	94190784	42460	LG07	19119474	19077062	42413	98.96
2	94190797	94251406	60610	LG07	19076865	19016324	60542	99.17
2	94251406	94264939	13534	LG07	19015953	19002417	13537	99.28
2	94264926	94268267	3342	LG07	18999782	18996440	3343	99.79
2	94268267	94310434	42168	LG07	18994765	18952610	42156	99.3
2	94310423	94314388	3966	LG07	18952418	18948451	3968	98.94
2	94314385	94321894	7510	LG07	18947603	18940088	7516	98.76
2	94321903	94324595	2693	LG07	18939197	18936504	2694	99.55
2	94326574	94327483	910	LG07	23670800	23669897	904	98.02
2	94327476	94361773	34298	LG07	18936520	18902206	34315	99.11
2	94361773	94379488	17716	LG07	18902079	18884382	17698	99.27
2	94380592	94384374	3783	LG07	18884112	18880326	3787	99.23
2	94385135	94405460	20326	LG07	18878520	18858201	20320	98.51
2	94406487	94467990	61504	LG07	18858202	18796730	61473	98.98
2	94467991	94509704	41714	LG07	18796471	18754779	41693	99.2
2	94509690	94532699	23010	LG07	18754264	18731314	22951	98.72
2	94533652	94547950	14299	LG07	18730775	18716511	14265	98.85
2	94547888	94549183	1296	LG07	18716491	18715182	1310	98.09
2	94549184	94565567	16384	LG07	18714930	18698556	16375	99.36
2	94565603	94606502	40900	LG07	18698563	18657649	40915	98.35
2	94606848	94729563	122716	LG07	18657595	18534904	122692	98.88
2	94729533	94775396	45864	LG07	18534857	18488958	45900	99.02
2	94775396	94777266	1871	LG07	18488844	18486971	1874	99.15
2	94777420	94850269	72850	LG07	18486982	18414156	72827	98.84
2	94850268	94877766	27499	LG07	18410470	18383012	27459	98.95
2	94877754	94887503	9750	LG07	18382425	18372682	9744	99.15
2	94888280	94915429	27150	LG07	18372693	18345529	27165	98.54
2	94915429	94919020	3592	LG04	37319591	37316002	3590	99.03
2	94919032	95069427	150396	LG07	18345523	18194923	150601	98.74
2	95069560	95071690	2131	LG07	18194927	18192774	2154	96.58
2	95071673	95158663	86991	LG07	18186429	18099464	86966	98.88
2	95158879	95187860	28982	LG07	18099466	18070461	29006	98.32
2	95188386	95272807	84422	LG07	18070461	17985960	84502	98.54
2	95272939	95395020	122082	LG07	17985960	17864024	121937	98.77
2	95395359	95408270	12912	LG07	17863408	17850504	12905	98.62
2	95409041	95424073	15033	LG07	17850504	17835445	15060	98.03
2	95424058	95430745	6688	LG07	17834099	17827420	6680	98.65
2	95430983	95468571	37589	LG07	17827413	17789813	37601	99.24
2	95471077	95477614	6538	LG07	17788431	17781941	6491	97.06
2	95477600	95535791	58192	LG07	17775096	17716849	58248	98.71
2	95536200	95537066	867	LG04	102790775	102789909	867	99.42
2	95538188	95590999	52812	LG07	17716863	17664072	52792	98.79
2	95591004	95611139	20136	LG07	17663636	17643481	20156	99.32
2	95611283	95634582	23300	LG07	17643480	17620198	23283	98.51
2	95634572	95720317	85746	LG07	17620071	17534270	85802	99.15
2	95720513	95734360	13848	LG07	17534270	17520391	13880	98.89
2	95734346	95803880	69535	LG07	17515366	17445912	69455	98.96
2	95803807	95917739	113933	LG07	17445903	17332025	113879	98.89
2	95917739	96009956	92218	LG07	17331889	17239736	92154	98.96
2	96010204	96113279	103076	LG07	17239750	17136624	103127	99.09
2	96113276	96229287	116012	LG07	17136669	17020632	116038	98.92
2	96229279	96237701	8423	LG07	17019016	17010577	8440	98.57
2	96240490	96245407	4918	LG07	17010574	17005662	4913	98.62
2	96245394	96349243	103850	LG07	17005542	16901756	103787	98.77
2	96348970	96417988	69019	LG07	16901745	16832762	68984	98.8
2	96417982	96487737	69756	LG07	16832479	16762812	69668	98.88
2	96489393	96617238	127846	LG07	16761125	16633142	127984	98.66
2	96617233	96619600	2368	LG07	16627985	16625620	2366	98.31
2	96619600	96636877	17278	LG07	16625322	16608087	17236	98.54
2	96637085	96796655	159571	LG07	16608096	16448552	159545	99
2	96796658	96811052	14395	LG07	16448393	16433989	14405	98.49
2	96811052	96869729	58678	LG07	16433843	16375152	58692	99.16
2	96870513	96875779	5267	LG07	16375166	16369889	5278	97.94
2	96873946	96907545	33600	LG07	16368580	16335060	33521	98.33
2	96907689	96934244	26556	LG07	16335060	16308420	26641	98.41
2	96934236	96972743	38508	LG07	16306257	16267777	38481	98.55
2	96972749	97002398	29650	LG07	16267263	16237588	29676	98.61
2	97005827	97047157	41331	LG07	16237604	16196289	41316	98.3
2	97047466	97122416	74951	LG07	16196261	16121341	74921	98.82
2	97122717	97138805	16089	LG07	16121356	16105333	16024	98.15
2	97138794	97139492	699	LG07	16105143	16104448	696	97.57
2	97139902	97181196	41295	LG07	16104442	16063181	41262	98.94
2	97181212	97229864	48653	LG07	16063219	16014482	48738	98.51
2	97230000	97343077	113078	LG07	16014481	15901326	113156	98.74
2	97343064	97386952	43889	LG07	15900588	15856837	43752	98.26
2	97386935	97416090	29156	LG07	15855499	15826357	29143	98.92
2	97421088	97439841	18754	LG07	15826365	15807625	18741	98.83
2	97439659	97460292	20634	LG07	15807902	15787283	20620	98.94
2	97460292	97533000	72709	LG07	15787112	15714391	72722	98.83
2	97533000	97540717	7718	LG07	28589663	28581931	7733	98.9
2	97533001	97540735	7735	LG04	73886307	73894088	7782	97.98
2	97540732	97587987	47256	LG07	15714406	15667327	47080	98.48
2	97588257	97625535	37279	LG07	15667326	15630128	37199	98.8
2	97625536	97668920	43385	LG07	15629739	15586464	43276	98.35
2	97670062	97695582	25521	LG07	15586463	15560962	25502	98.69
2	97695959	97792894	96936	LG07	15560655	15463740	96916	98.57
2	97796494	97797726	1233	LG07	15463435	15462203	1233	98.62
2	97798456	97806323	7868	LG07	15462202	15454338	7865	98.95
2	97806384	97813788	7405	LG07	15454345	15446952	7394	98.92
2	97813788	97825651	11864	LG07	15446845	15434983	11863	99.65
2	97825698	97826276	579	LG04	90136036	90135458	579	100
2	97826276	97831743	5468	LG07	15434981	15429510	5472	99.4
2	97831929	97888380	56452	LG07	15429522	15373085	56438	98.35
2	97888366	97906839	18474	LG07	15372593	15354111	18483	98.77
2	97911712	98020056	108345	LG07	15355268	15246816	108453	98.54
2	98024762	98027783	3022	LG04	83777026	83774004	3023	98.81
2	98027796	98110955	83160	LG07	15246834	15163639	83196	98.55
2	98112069	98115584	3516	LG07	15160967	15157455	3513	98.3
2	98115704	98157843	42140	LG07	15157455	15115266	42190	98.76
2	98159275	98197205	37931	LG07	15113843	15075926	37918	98.84
2	98197327	98270504	73178	LG07	15075923	15002748	73176	98.51
2	98270776	98310523	39748	LG07	15003408	14963663	39746	98.76
2	98310510	98323731	13222	LG07	14962729	14949512	13218	99.39
2	98323728	98327816	4089	LG07	14949224	14945135	4090	99.14
2	98327802	98340879	13078	LG07	14943611	14930550	13062	98.95
2	98341086	98418657	77572	LG07	14930548	14852976	77573	99.19
2	98419331	98475690	56360	LG07	14852976	14796657	56320	98.71
2	98478326	98521634	43309	LG07	14796668	14753333	43336	98.19
2	98523028	98654084	131057	LG07	14753347	14622297	131051	98.74
2	98654070	98662304	8235	LG07	14620681	14612398	8284	98.43
2	98663385	98697138	33754	LG07	14612395	14578613	33783	98.79
2	98697888	98699913	2026	LG07	14578608	14576581	2028	98.47
2	98700064	98754878	54815	LG07	14576581	14521699	54883	99.01
2	98754894	98903553	148660	LG07	14521509	14372801	148709	99.06
2	98904825	98954438	49614	LG07	14364695	14315042	49654	97.96
2	98956439	98974228	17790	LG07	14315042	14297237	17806	96.94
2	98975649	98986827	11179	LG07	14297237	14286092	11146	97.39
2	98986813	99025695	38883	LG07	14284470	14245481	38990	98.11
2	99025947	99079057	53111	LG07	14245481	14192404	53078	99.09
2	99079058	99113126	34069	LG07	14192271	14158221	34051	99.23
2	99113137	99127466	14330	LG07	14157850	14143599	14252	98.08
2	99127926	99174011	46086	LG07	14143612	14097429	46184	98.31
2	99173999	99180554	6556	LG07	14097057	14090523	6535	98.93
2	99188277	99239146	50870	LG07	14090536	14039672	50865	98.86
2	99239141	99265007	25867	LG07	14034217	14008363	25855	98.46
2	99265005	99275255	10251	LG07	14008068	13997805	10264	98.81
2	99275905	99293996	18092	LG07	13997810	13979699	18112	98.92
2	99296331	99302425	6095	LG07	13979712	13973620	6093	99.47
2	99302423	99333175	30753	LG07	13973222	13942427	30796	99.35
2	99333607	99347357	13751	LG07	13935501	13921783	13719	98.27
2	99348725	99373083	24359	LG07	13917998	13893604	24395	97.61
2	99373433	99433256	59824	LG07	13893618	13833753	59866	98.86
2	99433256	99498094	64839	LG07	13833570	13768673	64898	98.5
2	99499743	99522148	22406	LG07	13765452	13743042	22411	98.27
2	99522133	99530238	8106	LG07	13741723	13733610	8114	98.73
2	99530238	99543973	13736	LG07	13733516	13719740	13777	98.29
2	99544077	99571645	27569	LG07	13719740	13692184	27557	98.47
2	99571936	99574636	2701	LG07	13692184	13689480	2705	98.15
2	99574742	99577994	3253	LG07	13689480	13686223	3258	98.22
2	99577989	99602600	24612	LG07	13684903	13660344	24560	98.73
2	99602597	99606315	3719	LG07	13659928	13656205	3724	98.5
2	99607156	99629669	22514	LG07	13656216	13633715	22502	98.54
2	99629764	99657381	27618	LG07	13633715	13606109	27607	97.95
2	99657385	99670580	13196	LG07	13605841	13592701	13141	97.73
2	99674168	99682040	7873	LG07	13591165	13583391	7775	97.19
2	99682592	99702245	19654	LG07	13574983	13555303	19681	98.61
2	99702230	99707048	4819	LG07	13552918	13548071	4848	98.51
2	99707036	99743667	36632	LG07	13540337	13503667	36671	98.26
2	99744074	99827890	83817	LG07	13503667	13419888	83780	98.66
2	99827882	99834379	6498	LG07	13419453	13412916	6538	97.98
2	99847693	99887837	40145	LG07	13400872	13360714	40159	99.31
2	99887900	99907812	19913	LG07	13360716	13340832	19885	98.87
2	99910256	99947927	37672	LG07	13340844	13303188	37657	98.4
2	99949282	99950907	1626	LG07	13303201	13301566	1636	98.17
2	99961905	99965642	3738	LG07	13294450	13290721	3730	98.16
2	99966165	99996430	30266	LG07	13289855	13259557	30299	98.86
2	99998104	99999523	1420	LG07	13259573	13258156	1418	99.3
2	100001046	100010724	9679	LG07	13258146	13248471	9676	99.36
2	100010721	100019296	8576	LG07	13248082	13239448	8635	98.03
2	100019284	100033608	14325	LG07	13238316	13224011	14306	98.58
2	100034195	100041949	7755	LG07	13223806	13216099	7708	97.9
2	100045352	100062935	17584	LG07	13214126	13196480	17647	98.03
2	100063833	100067193	3361	LG07	13196490	13193120	3371	99.5
2	100067715	100074266	6552	LG07	13193128	13186598	6531	98.87
2	100074251	100090893	16643	LG07	13186441	13169800	16642	98.9
2	100091486	100094773	3288	LG07	13169809	13166516	3294	98.79
2	100094895	100106966	12072	LG07	13166516	13154440	12077	99.1
2	100106952	100128745	21794	LG07	13153239	13131401	21839	99.12
2	100128900	100143333	14434	LG07	13131394	13117032	14363	97.95
2	100143318	100157385	14068	LG07	13116380	13102225	14156	96.25
2	100158505	100171487	12983	LG07	13102233	13089272	12962	98.14
2	100171473	100181732	10260	LG07	13087839	13077574	10266	98.61
2	100183258	100201674	18417	LG07	13076734	13058302	18433	99.26
2	100201779	100241766	39988	LG07	13058302	13018349	39954	98.8
2	100241768	100244480	2713	LG04	12642681	12645393	2713	98.93
[truncated: 3,112 more rows]

## Sheet: Table S9
Supplemental Table S9. Homologous chromosomes among goat, argali and Tibetan sheep.
Goat	Argali	Tibetan sheep
G1	LG01	Chr1
G2	LG04	Chr2
G3	LG01	Chr1
G4	LG05	Chr4
G5	LG02	Chr3
G6	LG06	Chr6
G7	LG08	Chr5
G8	LG07	Chr2
G9	LG11	Chr8
G10	LG09	Chr7
G11	LG02	Chr3
G12	LG12	Chr10
G13	LG13	Chr13
G14	LG10	Chr9
G15	LG14	Chr15
G16	LG15	Chr12
G17	LG16	Chr17
G18	LG19	Chr14
G19	LG20	Chr11
G20	LG17	Chr16
G21	LG18	Chr18
G22	LG22	Chr19
G23	LG24	Chr20
G24	LG21	Chr23
G25	LG23	Chr24
G26	LG25	Chr22
G27	LG27	Chr26
G28	LG28	Chr25
G29	LG26	Chr21
X	LG03	X

## Sheet: Table S10
Supplemental Table S10. Information for the breakpoints on chromosomes 1, 2, 3, 5, 8 and 11 in goat, pesudochromosomes LG01 and LG02 in argali and chromosomes 1, 2, 3 in domestic sheep.
Goat			Argali			Tibetan sheep			Rambouillet sheep
Chromosome	Position	Repeats of start sequences	Pseudo-chromosome	Position	Repeats of start sequences	Chromosome	Position	Repeats of start sequences	Chromosome	Position	Repeats of start sequences
G1	95568	CGTGGGAAAGCCT	LG01	158153279	CGTGGGAAAGCCT	Chr1	122603896	CGTGGGAAAGCCT	Chr1	120841622	/
G3	74490	gggggcccacgtgattgcccct gggggcccacgtgatttcccct CGTGGGAAAGCCT	LG01	159174315		Chr1	122340515		Chr1	121000977
G5	67666	gggggcccacgtgattgcccct gggggcccacgtgatttcccct GTGGGAAAGCCTC	LG02	119668390	GTGGGAAAGCCTC	Chr3	106738379	/	Chr3	106586027	GTGGGAAAGCCTC
G11	545834	GTGGGAAAGCCTC	LG02	119849369		Chr3	106738269		Chr3	106677869
G2	148674	gggggcccacgtgattgcccct gggggcccacgtgatttcccct TTTCCCACGAGGC	LG07	11819	TTTCCCACGAGGC	Chr2	113415043	TTTCCCACGAGGC	Chr2	112909205	/
G8	97403	gggggcccacgtgattgcccct gggggcccacgtgatttcccct TTTCCCACGAGGC	LG04	4011	TTTCCCACGAGGC	Chr2	113148354		Chr2	112985988

[truncated: 16 more sheets: Table S11, Table S12, Table S13, Table S14, Table S15, Table S16, Table S17, Table S18, Table S19, Table S20, Table S21, Table S22, Table S23, Table24, Table S25, Table S26]
